ANALYSIS OF GLOMERULAR TRANSCRIPTOMES FROM NEPHROTIC PATIENTS SUGGEST  
*APOL1* RISK VARIANTS IMPACT PARIETAL EPITHELIAL CELLS

Agustin Gonzalez-Vicente<sup>1,2</sup>, Dana C. Crawford<sup>3,4,5</sup>, William S. Bush<sup>3,4,5</sup>, Zhenzhen Wu<sup>6</sup>, Leslie A. Bruggeman<sup>2,6</sup>, Viji Nair<sup>7,8</sup>, Felix Eichinger<sup>7,8</sup>, Oliver Wessely<sup>9</sup>, Matthias Kretzler<sup>7,8</sup>, John F. O'Toole<sup>2,6</sup>, John R. Sedor<sup>1,2,6</sup>, for the Kidney Precision Medicine Project<sup>10</sup> and the Nephrotic Syndrome Study Network<sup>11</sup>

- 1- Department of Physiology and Biophysics, Case Western Reserve University School of Medicine, Cleveland, Ohio.
- 2- Department of Kidney Medicine, Medical Specialties, Cleveland Clinic Cleveland, Ohio.
- 3- Department of Population and Quantitative Health Sciences, Case Western Reserve University, Cleveland, OH
- 4- Cleveland Institute for Computational Biology, Case Western Reserve University, Cleveland, OH
- 5- Department of Genetics and Genome Sciences, Case Western Reserve University, Cleveland, OH
- 6- Department of Inflammation and Immunity, Lerner Research Institute, Cleveland Clinic, Cleveland, Ohio
- 7- Department of Medicine, Division of Nephrology, University of Michigan, Ann Arbor, MI,
- 8- Department of Computational Medicine and Bioinformatics, University of Michigan, Ann Arbor, MI
- 9- Department of Cardiovascular and Metabolic Sciences, Lerner Research Institute, Cleveland Clinic, Cleveland, Ohio
- 10- Members of the Kidney Precision Medicine Project are listed in the Appendix.
- 11- Members of the Nephrotic Syndrome Study Network are listed in the Appendix.

Running title: *APOL1* risk variants and glomerular transcriptomes

Corresponding authors:

John R. Sedor, M.D.

Department of Kidney Medicine

Medical Specialties Institute Q7

Cleveland Clinic

9500 Euclid Ave, Cleveland, OH 44195.

[sedorj@ccf.org](mailto:sedorj@ccf.org)

Agustin Gonzalez-Vicente, Ph.D.

Department of Physiology and Biophysics

Case Western Reserve University School of Medicine

10900 Euclid Ave, Cleveland, OH 44106.

[agustin.gonzalezvicente@case.edu](mailto:agustin.gonzalezvicente@case.edu)

Key words: podocytopathy, kidney disease, podocytes

1 **ABSTRACT**

2 The disproportionate risk for idiopathic proteinuric podocytopathies in Black people is explained, in part,  
3 by the presence of two risk alleles (G1 or G2) in the *APOL1* gene. The pathogenic mechanisms responsible  
4 for this genetic association remain incompletely understood. We analyzed glomerular RNASeq  
5 transcriptomes from patients with idiopathic nephrotic syndrome of which 72 had inferred African  
6 ancestry (AA) and 152 did not (noAA). Using gene coexpression networks we found a significant  
7 association between *APOL1* risk allele number and the coexpression metamodule 2 (MM2), even after  
8 adjustment for eGFR and proteinuria at biopsy. Unadjusted Kaplan-Meier curves showed that unlike  
9 noAA, AA with the highest tertile of MM2 gene activation scores were less likely to achieve complete  
10 remission ( $p \leq 0.014$ ). Characteristic direction (ChDir) identified a signature of 1481 genes, which separated  
11 patients with *APOL1* risk alleles from those homozygous for reference *APOL1*. Only in AA, the tertile with  
12 the highest activation scores of these 1481 genes was less likely to achieve complete remission ( $p \leq 0.022$ )  
13 and showed a trend to faster progression to the composite event of kidney failure or loss of 40% eGFR  
14 ( $p \leq 0.099$ ). The MM2 and ChDir genes significantly overlapped and were both enriched for Epithelial  
15 Mesenchymal Transition and inflammation terms. Finally, MM2 significantly overlapped with a parietal  
16 epithelial cell (PEC)-identity gene signature but not with a podocyte identity signature. Podocytes  
17 expressing variant *APOL1*s may generate inflammatory signals that activate PECs by paracrine  
18 mechanisms contributing to *APOL1* nephropathy.  
19

## 20 INTRODUCTION

21 Progressive chronic kidney diseases (CKD) are more common among Black people than other populations.  
22 The excess risk for non-diabetic CKD is associated with 2 *APOL1* variants (G1 and G2), unique to some  
23 African ancestral populations, under a recessive model of inheritance. The incomplete penetrance of the  
24 *APOL1* risk genotypes is consistent with disease modifiers, mostly undefined, but including recently  
25 discovered genetic modifiers [1-3] and high interferon states that drive *APOL1* expression [4]. Induced  
26 kidney risk *APOL1*s, but not reference *APOL1* (G0), insert into the plasma membrane and form non-  
27 selective cation channels. The resulting sodium and potassium fluxes or the intracellular calcium increase  
28 result in activation of incompletely characterized cytotoxic pathways [5-9]. Animal models to study *APOL1*  
29 kidney disease mechanisms are limited to transgenesis, since only humans and some non-human primates  
30 carry the *APOL1* gene. Mice expressing *APOL1* risk variants, but not G0 transgenes, by either podocyte-  
31 specific tetracycline inducible expression systems, human *APOL1*-containing fosmids, or bacterial artificial  
32 chromosomes, develop kidney injury [10-12]. These findings establish a causal link between the  
33 expression of *APOL1* risk variants and kidney disease, but do not clearly define the mechanisms underlying  
34 the kidney injury [10-12]. G1, but not G0, kidney organoids, treated with interferon- $\gamma$  to induce *APOL1*  
35 expression and exposed to tunicamycin to simulate a stress, demonstrated epithelial dedifferentiation but  
36 remained viable [13]. Most animal and *in vitro* studies demonstrating cytotoxic mechanisms fail to model  
37 a triggering stress; instead, *APOL1* is ectopically expressed which might short-circuit endogenous  
38 regulatory pathways that mitigate *APOL1*-dependent cytotoxicity. To explore *APOL1* pathobiology in  
39 humans, we analyzed the glomerular transcriptomes from the Nephrotic Syndrome Study Network  
40 (NEPTUNE) kidney biopsy cohort, which includes participants with focal segmental glomerulosclerosis  
41 (FSGS), steroid resistant nephrotic syndrome and membranous nephropathy. Since *APOL1* risk genotypes  
42 are strongly associated with idiopathic proteinuric podocytopathies, we hypothesized that “individuals  
43 with *APOL1* risk-alleles have a glomerular transcriptional signature, which could identify candidate disease  
44 mechanisms”. A previous study of *APOL1* using the NEPTUNE glomerular transcriptomes was limited to  
45 30 self-identified or genotype-predicted Black subjects with a histologic diagnosis of FSGS [14]. Clinical  
46 glomerular histology poorly aligns with molecular mechanisms [15]. In addition, *APOL1* risk genotypes  
47 associate with steroid-resistant nephrotic syndrome and idiopathic membranous nephropathy [16-19].  
48 Given this, we included all NEPTUNE subjects with glomerular transcriptomes and *APOL1* genotypes  
49 validated by DNA sequencing, regardless of the clinical histopathological diagnosis.

50

## 51 RESULTS

52 We used a systems biology approach to study the pathobiology of *APOL1* kidney risk variants in a cohort  
53 of patients with nephrotic syndrome. An overview of the methodology is presented in **Supplemental**  
54 **Figure 1**.

55 **Clinical characteristics of the cohort (Table 1)**. NEPTUNE participants with glomerular transcriptomes and  
56 validated *APOL1* genotypes (n=224) were included in these analyses; 72 participants had inferred (see  
57 Methods) African Ancestry (AA) and 152 individuals reported other ancestries (noAA). AA participants had  
58 lower eGFRs ( $76 \pm 37$  vs  $95 \pm 43$  ml/min/1.73m<sup>2</sup>;  $p \leq 0.001$ ) and were significantly more likely to be  
59 hypertensive at time of biopsy ( $p \leq 0.01$ ). Proteinuria in AA was marginally lower compared to noAA  
60 participants ( $p \leq 0.054$ ). In AA, kidney biopsy diagnosis was more frequently FSGS and less commonly  
61 minimal change disease (MCD) or membranous nephropathy (MN). The distributions of *APOL1* alleles

62 stratified by the kidney biopsy nephrotic syndrome diagnosis are shown in **Supplemental Table 1**. Similar  
63 numbers of AA and noAA participants were treated with immunosuppressants, or drugs that inhibited the  
64 renin angiotensin aldosterone system.

65 Lower eGFR in AA NEPTUNE participants could reflect social factors that negatively affect health [20]. If  
66 lower eGFR in AA primarily reflects social determinants, we reasoned it would be similar in AA participants  
67 with and without *APOL1* risk variants and lower than eGFR in noAA participants. Baseline eGFRs were  
68 stratified by ancestry (AA vs noAA) and eGFRs in AA participants further grouped by 0, 1, and 2 *APOL1* risk  
69 alleles (RA) (**Supplemental Table 1**). Median (IQR) eGFRs between groups were significantly different  
70 ( $p \leq 6 \times 10^{-6}$ ) (**Figure 1**). Post-test, pairwise comparisons showed that the median eGFR ranks in noAA  
71 ( $n=140$ ) and AA\_0RA ( $n=20$ ) participants were almost identical and significantly higher than mean eGFRs  
72 for both AA\_2RA ( $n=22$ ) and AA\_1RA ( $n=30$ ) participants. Together, these data suggest that in this cohort,  
73 the lower eGFR in AA is associated with *APOL1* risk alleles, but not with the social, physical, and  
74 institutional contexts shared by many AA.

75 **Weighted gene co-expression analysis (WGCNA) and module-trait correlations.** We used WGCNA to  
76 identify gene coexpression modules correlated with *APOL1* genotypes. Ancestry-specific patterns of  
77 genetic architecture and social factors can affect gene expression [21-24] and contribute to transcriptional  
78 heterogeneity [25]. To mitigate transcriptional heterogeneity reflecting ancestry and enrich for gene  
79 expression reflecting biologic pathways driving *APOL1* nephropathy, we created a WGCNA network using  
80 only individuals with AA. The resulting network comprises 42 gene coexpression modules clustered  
81 together into 12 higher order structures called metamodules (**Supplemental Figure 2**).

82 Next, we used the AA network to determine module-trait correlations in the whole NEPTUNE cohort  
83 ( $n=224$ ) with the following traits: eGFR,  $\log(1 + \text{UPCR [urinary protein creatinine ratio]})$  (UPCR\_lg), FSGS,  
84 AA, the number of *APOL1* risk alleles (*APOL1\_RA*). A summary of the significant correlations is shown in  
85 **Figure 2**, while the Pearson correlation coefficients and nominal p-values are in **Supplemental Figure 3**.

86 UPCR and eGFR are strong predictors of kidney disease progression [26]. In this analysis, eGFR and  
87 UPCR\_lg concordantly correlated with multiple modules, indicating that the integrity of the glomerular  
88 filtration barrier is reflected in complex transcriptional regulation within the glomerulus. Interestingly,  
89 three modules, Darkturquoise, Salmon and Midnightblue, were significantly correlated with the number  
90 of *APOL1* risk alleles ( $p\text{-Adj} \leq 8 \times 10^{-4}$ ,  $p\text{-Adj} \leq 1 \times 10^{-5}$  and  $p\text{-Adj} \leq 2 \times 10^{-3}$ , respectively) as well as with FSGS. In  
91 addition, the Salmon module also correlated with AA ( $p\text{-Adj} \leq 0.042$ ), which may suggest ancestry is a  
92 confounder of *APOL1* risk allele variants. However, the significant association of the Salmon module with  
93 the number *APOL1* risk alleles persisted even when module-trait correlations were conducted solely in AA  
94 participants ( $p\text{-Adj} \leq 0.029$ ), indicating that the latter is not the case.

95 In addition to the number of *APOL1* risk alleles, the Darkturquoise, Salmon, and Midnightblue modules  
96 showed significant correlations with eGFR and UPCR\_lg. In the NEPTUNE cohort, participants carrying 1  
97 or 2 *APOL1* risk alleles had significantly lower eGFR compared to those homozygous for the G0 allele  
98 (**Figure 1**), while AA had marginally lower UPCR at the time of biopsy (**Table 1**). To account for this, we  
99 repeated the module-trait correlation analysis using eGFR- and UPCR-adjusted transcriptomes. Only the  
100 Darkturquoise and Salmon modules remained associated with the number of *APOL1* risk alleles, both with  
101  $p\text{-Adj} \leq 0.008$  (**Figure 2**). Darkturquoise and Salmon are the only modules clustered together in MM2  
102 (**Supplemental Figure 2**); therefore, we focused on analyzing MM2 as a whole in subsequent analyses.



103 **Clinical outcomes associate with MM2 gene activation scores.** To assess the clinical significance of the  
104 MM2 gene set (n=437 genes), we generated a mean z-score from the transcriptional data for each  
105 participant, who were then binned by tertiles of mean gene activation. Clinical outcomes were available  
106 on 191 NEPTUNE participants (60 AA; 131 noAA). An unadjusted Kaplan-Meier analysis using a log rank  
107 test was used to determine significant differences in outcomes in AA and noAA, respectively. AA with the  
108 highest MM2 tertile of gene activation scores had longer times to remission ( $p = 0.014$ ), and trended to  
109 poorer outcomes, as captured by of the composite endpoint of kidney failure or loss of 40% of eGFR. This  
110 association and trend were not present in the noAA cohort (**Figure 3**). The most highly significant  
111 Molecular Signatures Database (MSigDB) Hallmark gene sets enrichments in MM2 were Epithelial  
112 Mesenchymal Transition (EMT), Estrogen Response Early and Apical Junction.

113 In contrast to MM2, the Midnightblue module (n=226 genes) remained correlated with FSGS but was no  
114 longer associated with *APOL1* risk allele number after adjustment for UPCR\_Ig and eGFR in WGCNA  
115 analysis (**Figure 2**). Both AA and noAA with the highest tertile of Midnightblue gene activation-scores had  
116 significantly longer times to remission (AA,  $p \leq 0.008$ ; noAA,  $p \leq 0.036$ ), while only in AA the highest tertile  
117 presented a marginally significant faster decline in kidney function ( $p \leq 0.059$ ) (**Supplemental Figure 4**).  
118 These data indicate that the Midnightblue gene module regulates the mechanisms resulting in FSGS  
119 histopathology, although the pathways may be modified by *APOL1*. The most highly enriched pathways  
120 in the Midnightblue module were TNF-alpha Signaling via NF-kB, EMT and Inflammatory Response  
121 (**Supplemental Figure 4**).

122 **Characteristic Direction (ChDir) identifies an *APOL1*-associated gene expression signature.** To identify  
123 differentially expressed genes associated with *APOL1* risk alleles, we used a linear classifier called ChDir,  
124 which ranks genes by their contribution to the overall differences in expression between two classes [27].  
125 To mitigate transcriptional heterogeneity reflecting ancestry, we generated a genome-wide ChDir  
126 signature by contrasting AA\_2RA to AA\_ORA participants. The top 1481 genes in the resulting ranked list  
127 (~10% of the gene space) accounted for 75% of the gene expression differences (**Supplemental Table 3**).  
128 Next, the significance of the expression differences of the 1481 ChDir signature genes across different  
129 *APOL1* genotypes, we conducted permutational multivariate analysis of variance (PERMANOVA). We  
130 showed that AA\_2RA and AA\_ORA patients could be significantly separated ( $p \leq 0.001$ ) using the Euclidean  
131 distance matrix of the 1481 ChDir gene space; and that in this context, the presence of *APOL1* risk alleles  
132 accounts for 6.4% of the total variability in gene expression between groups (**Figure 4-A**). Next, we  
133 repeated the analysis including all NEPTUNE participants stratified by inferred ancestry and number of  
134 *APOL1* risk alleles *i.e.* AA\_2RA, AA\_1RA, AA\_ORA and noAA\_ORA. Again, PERMANOVA shown significant  
135 separation of these groups ( $p \leq 0.001$ ), with the presence of *APOL1* risk alleles accounting for 3.0% of the  
136 total variability (**Figure 4-B**). Post-test pairwise comparisons showed that the centroid of noAA was  
137 significantly separated from the centroids of AA\_1RA ( $p \leq 0.006$ ) and AA\_2RA ( $p \leq 0.006$ ). Similarly, the  
138 centroid from AA\_ORA was significantly separated from those of AA\_1RA ( $p \leq 0.024$ ) and AA\_2RA  
139 ( $p \leq 0.006$ ). Importantly, the centroids of AA\_ORA and noAA\_ORA did not segregated ( $p \leq 0.25$ ), nor did those  
140 from AA\_1RA and AA\_2RA ( $p \leq 0.46$ ). As a negative control, we repeated the analysis using the lower 13151  
141 ChDir signature genes. Within this gene space, PERMANOVA failed to significantly separate groups  
142 (**Supplemental Figure 5**). Finally, we determined if the *APOL1* ChDir gene signature could cluster an  
143 orthogonal dataset, glomerular transcriptomes from dual transgenic mice with the Tg26 transgene to  
144 model of HIV-associated nephropathy and with either *APOL1*-G0 (n=8) or *APOL1*-G2 (n=12) transgenes in

145 podocytes [28, 29]. *APOL1* variants are strongly associated with HIV-associated nephropathy and FSGS.  
146 We identified 1237 mouse orthologues of the human 1481 *APOL1* ChDir signature genes, which  
147 significantly separated G2 from G0 mice ( $p \leq 0.032$ ) accounting for 8.8% of the intergroup variance (**Figure**  
148 **4-C**).

149 **Clinical outcomes associate with the ChDir *APOL1* gene signature activation scores.** We generated z-  
150 scores for the 1481 genes in the *APOL1* gene signature for both AA and noAA NEPTUNE participants and  
151 stratified them into gene activation tertiles. Individuals with the highest gene activation scores had  
152 significantly faster times to the composite event in AA ( $p \leq 0.013$ ) but not in noAA ( $p \leq 0.89$ ). No significant  
153 differences were observed in either group for achieving complete remission (**Figure 5**). The most highly  
154 enriched pathways included Allograft Rejection, EMT, Inflammatory Response, KRAS Signaling Up and IL-  
155 6/JAK/STAT3 Signaling.

156 The enrichment terms from the ChDir *APOL1* gene signature and MM2, which correlated with *APOL1* risk  
157 allele number, were similar. Thus, we reasoned that the ChDir signature and MM2 gene set would overlap  
158 and be enriched with genes associated with *APOL1* pathogenesis. In the MM2\_Salmon module 129 genes,  
159 from a total of 273 significantly overlapped with the 1481 genes of the *APOL1* signature (Adjusted Fisher  
160 exact test  $p \leq 4 \times 10^{-49}$ ), while in the MM2\_Darkturquoise module 62 genes, from a total of 164 significantly  
161 overlapped with the *APOL1* signature gene space (adjusted Fisher exact test  $p \leq 1 \times 10^{-19}$ ). (**Supplementary**  
162 **Table 3**).

163 **Glomerular cell-identity gene signatures cluster *APOL1* genotypes.** We next leveraged gene expression  
164 data from the Kidney Precision Medicine Project (KPMP) Kidney Tissue Atlas to generate cell-identity gene  
165 signatures containing genes enriched in, but not unique to, specific glomerular cell types (**Supplemental**  
166 **Table 4**). The glomerular cell identity signatures contained the following numbers of genes for each cell  
167 type: 1) glomerular visceral epithelium (POD, podocytes) 1814 genes, 2) glomerular parietal epithelium  
168 (PEC) 1220 genes, 3) glomerular capillary endothelium (EC-GC) 1298 genes, and 4) glomerular mesangium  
169 (MC) 1131 genes. In addition, we obtained cell-exclusive gene signatures containing genes with a positive  
170 fold change in only one kidney cell type (**Supplemental Table 5**).

171 As podocyte dysfunction characterizes primary nephrotic syndrome and podocytes express *APOL1* [30],  
172 we hypothesized that the transcriptional impact of *APOL1* variants would be primarily reflected in  
173 podocytes, in particular the podocyte identity gene signature. Using PERMANOVA, we next tested if the  
174 Euclidean distance matrix calculated from different glomerular cell-identity gene signatures would  
175 separate the NEPTUNE cohort by *APOL1* risk allele number. The distance matrix from the 1814 POD gene  
176 identity signature genes separated *APOL1* RA carriers from individuals with no *APOL1* RA, explaining 2%  
177 of the overall variability ( $p \leq 0.024$ , **Figure 6-A**). However, post-test comparisons showed that only  
178 transcriptomes from AA\_2RA and noAA\_ORA were significantly different ( $p\text{-Adj} \leq 0.048$ ) using the POD-  
179 identity gene space. In addition to podocytes, the PEC identity signature was also able to significantly  
180 cluster patients ( $p \leq 0.001$ ) by ancestry and presence of *APOL1* RA, explaining 3% of the overall variability  
181 (**Figure 6-B**). Post-test pairwise comparisons showed that the centroids from AA and noAA without *APOL1*  
182 risk alleles were significantly different from those from AA, who carried one or two *APOL1* risk alleles. In  
183 addition, the centroids from AA\_ORA and noAA\_ORA or AA\_1RA and AA\_2RA were not significantly  
184 different. Finally, the MC and ECGC identity gene signatures failed to cluster NEPTUNE participants by  
185 *APOL1* risk allele status (**Supplemental Figure 6**). Together, these results indicate that the impact of *APOL1*

186 variants on glomerular cells transcriptomes was not limited to podocytes as we originally thought, but  
187 more markedly present in PECs.

188 Since the POD- and PEC-identity genes separated individuals by *APOL1* RA status, we hypothesized that  
189 these gene sets would be enriched in MM2. Thus, we used the Fisher exact test to evaluate the overlap  
190 between metamodules and cell-exclusive gene signatures (**Figure 7-A**). Our results indicate that MM2  
191 (Salmon and Darkturquoise), which is associated with the number of *APOL1* risk alleles, reflects  
192 transcriptional programs active in PECs. On the other hand, MM4 (Cyan, Darkred, Grey60 and Skyblue3),  
193 and MM10 (DarkOrange), which associated with GFR and proteinuria (**Figure 2**), overlap with  
194 transcriptional programs in podocytes. The complete mapping of sub-region exclusive genes to  
195 metamodules can be found in **Supplemental Table 4**. Finally, we calculated the scores of MM2, MM4 and  
196 MM10 using a reference adult human kidney (GSE169285) dataset containing integrated single-cell and –  
197 nuclei transcriptomes. In this analysis, we provided the gene spaces of each of the aforementioned  
198 metamodules, to calculate an aggregate expression score across glomerular cells confirming that MM2  
199 genes are most highly express in PECs, while MM4 and MM10 genes are most highly expressed in POD  
200 (**Figure 7-B**), confirming previous results.

201

## 202 **DISCUSSION**

203 Previous studies in the NEPTUNE cohort assessing the impact of *APOL1* kidney risk variants on glomerular  
204 transcriptomes, only included self-identified ‘black/African American’ participants diagnosed with FSGS  
205 [14, 31]. In this study, we analyzed the entire NEPTUNE cohort with glomerular RNAseq and *APOL1*  
206 genotype data, since *APOL1* kidney risk variants associate with steroid resistant nephrotic syndrome and  
207 worse kidney outcomes in people with membranous nephropathy [16-19]. Using two distinct analytic  
208 methods, WGCNA and ChDir, we identified glomerular gene signatures that significantly associated with  
209 *APOL1* risk allele number. These signatures shared 191 genes, and were associated with kidney outcomes  
210 in Black NEPTUNE participants. Both signatures were enriched in MSigDB Hallmark gene sets that  
211 represent EMT and inflammation pathways, but not cell death. The ChDir gene signature was validated  
212 with an orthogonal glomerular transcriptome dataset from mice with HIV-associated nephropathy that  
213 carry *APOL1* G0 or G2 transgenes [28, 29]. Using the KPMP expression data to generate kidney cell-identity  
214 gene signatures and gene module-scores in glomerular cells, we discovered that *APOL1* kidney risk  
215 variants not only modify podocyte transcriptomes but also impact the gene expression landscape of PECs.  
216 Collectively, these data suggest that *APOL1* kidney disease risk variants alter the podocyte cell state,  
217 leading to the activation of PECs, a cell strongly implicated in glomerular injury, through a yet to be defined  
218 paracrine pathway. Podocytes are specialized cells with epithelial and mesenchymal characteristics and  
219 constitutively synthesize *APOL1* [30, 32, 33]. The enrichment of genes from a PEC identity signature in the  
220 WGCNA metamodule that correlated with *APOL1* variant number was unexpected. However, podocytes  
221 and PECs share a common epithelial lineage during development until they diverge late in  
222 glomerulogenesis [34]. A growing body of evidence demonstrates that communication between  
223 podocytes and PECs mediates the onset and progression of podocytopathies [35, 36]. Genetic cell lineage  
224 tracing in transgenic mice has definitively shown that PEC activation after podocyte injury is a key driver  
225 of glomerular scarring and collapse [37]. Histologic analyses of human FSGS using cell marker studies  
226 demonstrate findings consistent with these mouse data [38, 39]. Multiple studies demonstrate a  
227 stereotypical response PECs to some types of podocyte injury, which is initiated by PEC proliferation,

228 followed by PEC migration onto the glomerular tuft and culminating in deposition of extracellular matrix  
229 [34, 35, 40]. Activated PECs are identified specifically in regions of podocyte loss with fibrous synechia  
230 between the capillary tufts and Bowman's capsule [41].

231 The mechanisms of PEC activation by podocyte injury are just being defined and focus primarily on  
232 podocyte loss, although paracrine signaling between PECs and podocytes has been demonstrated [42-44].  
233 Variant *APOL1*s associate with a spectrum of kidney disease phenotypes [4, 45], which include podocyte  
234 injury that could result in PEC differentiation. Multiple mechanisms have been proposed for *APOL1*  
235 podocytopathy, mostly focused on cytotoxicity especially in high interferon inflammatory states.  
236 However, IFN $\gamma$  treatment drives organoid podocytes to a more immature phenotype with maintenance  
237 of junctional complexes with the slit diaphragm protein ZO1 and without podocyte loss [46]. Trajectory  
238 inference of G1 organoid podocytes showed a shift to more immature phenotypes [13], and data from  
239 other cell models suggest variant *APOL1* generate podocyte dedifferentiation phenotypes characteristic  
240 of podocytopathy [6, 47, 48]. Interestingly, two reports demonstrate *APOL1* expression in PECs in HIV-  
241 and COVID associated nephropathy [49, 50], raising the possibility that *APOL1* could directly regulate PEC  
242 activation in disease.

243 Both our WGCNA and ChDir analyses suggests that a single *APOL1* risk variant impacts the glomerular  
244 transcriptional landscape. Our data is consistent with a model whereby a single *APOL1* risk variant  
245 generates a transcriptional prodromal state, which permits development of kidney disease in the  
246 presence of specific secondary stresses/conditions. While the presence of two *APOL1* risk alleles robustly  
247 associates with kidney disease phenotypes, several studies suggest that heterozygous carriers may also  
248 be susceptible to kidney diseases [51-54]. A recent study involving a large West African cohort of Stage 2  
249 through 5 CKD found that while biallelic *APOL1* risk variant carriers have 25% higher odds of developing  
250 CKD, participants carrying 1 risk allele present 18% higher CKD odds than homozygous G0 [55]. In addition,  
251 genetic modifiers affect the pathogenicity of *APOL1* risk variants including the haplotype background of  
252 the G0 [2] and G2 [1], and stop-gain variant in *APOL3* (p.Q58\*), which was associated with increased CKD  
253 risk in individuals with a single *APOL1* kidney risk allele [56]. Together these studies highlight the need to  
254 extend genotyping beyond G1 and G2 polymorphisms [57] to more precisely characterized kidney risk.

255 This study has limitations. NEPTUNE is unique in its age range and diversity and a replication cohort is not  
256 available. Other cohorts of people who have kidney transcriptomes are not diverse or do not include  
257 patients with nephrotic syndrome. In addition, the sample size is limited to 72 NEPTUNE participants with  
258 AA. Multi-omic annotation of kidney tissue obtained from appropriately powered cohorts of people with  
259 and without *APOL1* kidney disease will certainly better define the driver cells and pathogenic mechanisms  
260 [58].

261

## 262 **METHODS**

263 **NEPTUNE glomerular transcriptomes and clinical data:** Glomerular transcriptomes (n=224) from  
264 microdissected glomeruli were obtained from the NEPTUNE consortium with their associated clinical data.  
265 A variable called "inferred African ancestry" (AA) was defined positive for those patients having an *APOL1*  
266 genotype different from G0/G0, and/or a self-reported race of "Black/African American" (n=72); while  
267 G0/G0 individuals, who did not self-identify as "Black/African American," were defined as not having  
268 African ancestry (noAA, n=152). In some analyses, the gene count matrix was adjusted for eGFR and UPCR  
269 by fitting a linear model and extracting the residuals.

270 **APOL1 transgenic mouse glomerular microarray data:** We generated glomerular transcriptomes from 40-  
271 day old Tg26 transgenic mice with *APOL1*-G0 or *APOL1*-G2 transgenes controlled by the murine *Nphs1*  
272 promoter [28, 29] using the Mouse Gene 2.0 ST Array (Affymetrix).

273 **Weighted Gene Co-Expression Network Analysis (WGCNA) in individuals with AA:** The 72 individuals  
274 with AA were selected to build a gene coexpression network with the R package WGCNA [59, 60]. The  
275 significance threshold in module-trait correlation analysis was adjusted by Bonferroni.

276 **Kaplan-Meier analysis with clinical outcomes:** We conducted Kaplan-Meier analysis using gene  
277 expression z-scores tertiles as surrogates for the gene module activation as previously reported [61, 62].  
278 The endpoint outcomes were “Complete Remission” or “Composite Event”. Differences between the  
279 tertiles [high, medium, low] curves were tested using the log-rank test. Independent analyses were  
280 conducted on AA and noAA. We analyzed the following gene spaces: 1) MM2 (437 genes), 2) Midnightblue  
281 module (226 genes) and 3) the *APOL1* ChDir signature (1481 genes).

282 **Functional enrichment analyses:** We utilized EnrichR [63, 64] to conduct functional enrichment analysis  
283 using the Molecular Signatures Database (MSigDB) Hallmark gene sets [65, 66].

284 **Characteristic Direction (ChDir):** ChDir [27] is a geometric multivariate approach to differential gene  
285 expression and was previously used by us and other investigators to obtain transcriptional signatures from  
286 proximal tubules [67, 68], podocytes [69], and human kidney cancerous cells [70]. ChDir generates  
287 normalized gene vectors representing the fractional contribution of each gene to the overall  
288 transcriptional differences between classes, which allows the extraction of the top-scoring classifier genes  
289 accounting for 75% of discrimination between classes. In our analyses, these genes represent a signature  
290 that differentiates individual by number of *APOL1* kidney risk alleles.

291 **Single-cell (sc) and single-nucleus (sn) RNAseq matrices:** We used sc- and snRNAseq transcriptomes from  
292 the KPMP to generate Cell-Identity and Cell-Exclusive gene signatures from 13 anatomical sub-regions of  
293 the kidney: 1) POD, 2) PEC, 3) MC, 4) EC-GC, 5) Proximal Tubule (PT), 6) Loop of Henle thin portion (Thin  
294 Limbs), 7) Loop of Henle thick portion (TAL), 8) Distal Convolution (DCT), 9) Connecting Tubule (CNT), 10)  
295 Collecting Duct (CD), 11) Endothelium Non-Glomerular (EC), 12) Stroma Non-Glomerular (SC), and 13)  
296 Immune (IMN). The total number of genes on each signature can be found in **Supplemental Table 5**.

297 **Permutational Multivariate Analysis of Variance (PERMANOVA) and Principal Coordinates Analysis**  
298 **(PCoA):** We used PERMANOVA [71, 72], as implemented in the R package 'vegan' [73], to determine the  
299 statistical significance of the ability of different gene sets to distinguish between two or more groups of  
300 patients or transgenic mice. We inputted the Euclidian distance matrix as it emphasizes the actual  
301 proximity of gene expression values [74] as opposed to WGCNA and ChDir analyses, which are leveraged  
302 towards covariance analysis. When more than two groups were compared, p values were corrected using  
303 the function *pairwise.adonis()* with default parameters [75]. PCoA was performed on the Euclidean  
304 distance matrix to visualize the separation between groups in a reduced dimensional space.

305 **Module Scores:** Gene module scores for MM2, MM4, and MM10 were generated in glomerular cells using  
306 the dataset from the "Integrated Single-nucleus and Single-cell RNA-seq of the Adult Human Kidney"  
307 (GSE169285).

308 **Statistics:** Unless otherwise noted, all data were analyzed with “R: A language and environment for  
309 statistical computing and graphics” (<https://www.R-project.org/>). Some data inspection, cleaning or  
310 formatting were conducted in Notepad++ (<https://notepad-plus-plus.org/>) or in Microsoft Excel, which  
311 was also used to prepare tables for publication.



312 **Study approval:** The NEPTUNE protocol is approved by the University of Michigan IRBMED central IRB  
313 (HUM00158219), and the Cleveland Clinic IRB (15-182). The KPMP study protocol is approved using a  
314 central IRB at the Human Research Protection Office of Washington University in St. Louis (IRB no.  
315 201902013). NEPTUNE and KPMP participants provided written informed consent prior to enrollment. All  
316 animal studies were conducted under oversight of the Case Western Reserve University's Institutional  
317 Animal Care and Use Committee (Protocol 2012-0099).

318

#### 319 **AUTHOR CONTRIBUTIONS**

320 A.G-V, J.F.O and J.R.S conceived and designed research;

321 Z.W, J.F.O, J.R.S and L.A.B. conducted experiments with the mice;

322 A.G-V and V.N curated the data;

323 A.G-V analyzed data;

324 A.G-V, J.F.O and J.R.S interpreted results;

325 A.G-V. and J.R.S wrote the manuscript and figures with input from all authors.

326 All authors provided critical feedback and helped shape the research, analysis and manuscript. All  
327 authors approved the final version of the manuscript.

328

#### 329 **ACKNOWLEDGEMENTS**

330 This work was supported by National Institute of Diabetes and Digestive and Kidney Diseases (NIDDK)  
331 grants K01DK128304, 5T32DK07470, R01DK097836 and R01DK108329. The NEPTUNE consortium, U54-  
332 DK083912, is a part of the NIH Rare Disease Clinical Research Network (RDCRN), supported through  
333 collaboration between the Office of Rare Diseases Research, National Center for Advancing Translational  
334 Sciences, and the NIDDK. See Supplemental Acknowledgments for NEPTUNE consortium details. KPMP is  
335 a multiyear project funded by the NIDDK with the purpose of understanding and finding new ways to treat  
336 chronic kidney disease and acute kidney injury. See Supplemental Acknowledgments for KPMP  
337 consortium details.

338 The Kidney Precision Medicine Project is funded by the following NIDDK grants: U01DK133081,  
339 U01DK133091, U01DK133092, U01DK133093, U01DK133095, U01DK133097, U01DK114866,  
340 U01DK114908, U01DK133090, U01DK133113, U01DK133766, U01DK133768, U01DK114907,  
341 U01DK114920, U01DK114923, U01DK114933, U24DK114886, UH3DK114926, UH3DK114861,  
342 UH3DK114915, and UH3DK114937.

343 We thank NEPTUNE and KPMP participants and their families, who contributed their time,  
344 biospecimens, clinical data and kidney tissue for research purposes and without whom this study would  
345 not be possible.

346

#### 347 **TABLE AND FIGURE LEGENDS**

348 **Table 1: Participant characteristics stratified by inferred African ancestry (AA).** Inferred AA was defined  
349 as either having an *APOL1* genotype different from G0/G0 or a self-reported race of "Black/African  
350 American" (NEPTUNE classification). Individuals homozygous for the *APOL1* G0 allele, who did not self-  
351 identified as "Black/African American", were designated as not having inferred African ancestry (noAA).  
352 Categorical variables are expressed as percentages, with p-values calculated using Fisher's exact test. Age,  
353 eGFR and log(1 + UPCR [urinary protein creatinine ratio]) (UPCR<sub>lg</sub>) are expressed as mean ± SD. The

354 Shapiro-Wilk test showed age ( $p \leq 1 \times 10^{-9}$ ), eGFR ( $p \leq 2 \times 10^{-6}$ ) and UPCR<sub>lg</sub> ( $p \leq 2 \times 10^{-16}$ ) significantly deviated  
355 from a normal distribution and the Wilcoxon rank sum test determined if differences between AA and  
356 noAA were significant. Subscripts (in parenthesis) are the numbers of individuals (n) in each group, which  
357 differs slightly between phenotypes due to missing data points.

358 **Figure 1: Boxplot of eGFR of the NEPTUNE study cohort participants.** Individuals were stratified by  
359 inferred African ancestry (AA) or noAA (see Methods) and by number of *APOL1* risk alleles (RA) as ORA,  
360 1RA and 2RA. The Median (IQR) of eGFRs (ml/min/1.73 m<sup>2</sup>) were: noAA\_ORA, 91 (71-113) [n=140];  
361 AA\_ORA, 101 (79-111) [n=20]; AA\_1RA, 74 (43-91) [n=29] and AA\_2RA, 62 (49-74) [n=21]. The median rank  
362 of these groups were significantly different (Kruskal Wallis,  $p \leq 2 \times 10^{-5}$ ). Post-test comparisons were  
363 conducted using the Wilcoxon rank sum test. The median eGFR rank for noAA\_ORA participants was  
364 significantly higher compared to the median eGFR ranks from AA\_1RA ( $p \leq 0.01$ ) and AA\_2RA ( $p \leq 0.0002$ ).  
365 The mean the eGFR rank from AA\_ORA was significantly different to those from AA\_1RA ( $p \leq 0.02$ ) and  
366 AA\_2RA ( $p \leq 0.002$ ). There were no significant differences in the mean eGFR ranks between AA\_ORA and  
367 noAA\_ORA or between AA\_1RA and AA\_2RA. The p values were adjusted by the method of Benjamini &  
368 Hochberg. #, significantly different from noAA\_ORA; @, significantly different from AA\_ORA. Open circles  
369 represent outliers.

370 **Figure 2: Module-Trait Correlations (MTC) analyses using the African ancestry network.** Independent  
371 MTC were conducted in all NEPTUNE participants (ALL), and ALL after adjustment for eGFR and UPCR (ALL  
372 eGFR/UPCR-Adjusted). The following traits were analyzed: eGFR,  $\log(1 + \text{UPCR})$  (UPCR<sub>lg</sub>), FSGS, *APOL1*  
373 risk alleles number (*APOL1*\_RA), and inferred African ancestry (African\_Anc). Multiple metamodules  
374 significantly associated with eGFR and UPCR<sub>lg</sub>. In addition, 6 modules associated with FSGS, 3 of which,  
375 Darkturquoise, Salmon and Midnightblue, also significantly associated with the number of *APOL1* risk  
376 alleles (See **Supplemental Table 2** for the genes contained in these modules). Orange/Up-arrows  
377 represent positive correlations, while Blue/Down-arrows represent negative correlations. Only significant  
378 correlations are shown. For each trait, we adjusted the p-values using the Bonferroni correction to  
379 account for the multiple tests conducted (1 test for each module). The complete statistics and nominal p  
380 values are presented in **Supplemental Figure 3**. Grey areas represent null data *i.e.* the correlations with  
381 eGFR or UPCR<sub>lg</sub> in the adjusted data; and lack of any significant correlation in modules within MM5,  
382 MM6 or MM7.

383 **Figure 3: Kaplan-Meier curves stratified by tertiles of metamodule 2 (MM2) gene activation scores in**  
384 **NEPTUNE AA and noAA participants.** Outcomes were time since kidney biopsy to a “Composite Event” of  
385 kidney failure or loss of 40% of eGFR, or to “Complete Remission” of proteinuria. Enrichr was used to  
386 obtain gene set enrichment analysis using the MSigDB Hallmark 2020 gene set (right panel and table).

387 **Figure 4: Principal Coordinates Analysis (PCoA) of the Euclidean distance matrix of the *APOL1* ChDir**  
388 **gene expression signature.** Statistical analysis was performed using PERMANOVA. **Panel A** displays the  
389 first two PCoA coordinates, showing the separation between the centroids of the AA\_ORA (black) and  
390 AA\_2RA (red) groups, with the ellipses representing the 95% confidence intervals. PERMANOVA indicates  
391 a statistically significant separation between these two groups, as evidenced by  $R^2 = 0.064$  and  $p \leq 0.001$ .  
392 **Panel B** expands the analysis to four groups of NEPTUNE participants: noAA\_ORA (black), AA\_ORA (black),  
393 AA\_1RA (red), and AA\_2RA (red). The ellipses indicate the 95% confidence intervals for each group, and  
394 PERMANOVA confirms significant differences between the group centroids ( $R^2 = 0.030$ ,  $p \leq 0.001$ ). Post-  
395 hoc pairwise comparisons (shown in the table) reveal significant separations between noAA\_ORA and



396 AA\_1RA ( $p \leq 0.006$ ), as well as AA\_ORA and AA\_2RA ( $p \leq 0.006$ ), but no significant differences between  
397 noAA\_ORA and AA\_ORA ( $p = 0.26$ ) or AA\_1RA and AA\_2RA ( $p = 0.46$ ). **Panel C** illustrates the separation  
398 between transgenic mice expressing the APOL1-G0 (black) and APOL1-G2 (red) variants, using 1237  
399 orthologues of the APOL1 ChDir gene signature. The analysis shows a significant separation between the  
400 two mice strains ( $R^2 = 0.088$ ,  $p \leq 0.032$ ).

401 **Figure 5: Kaplan-Meier curves, stratified by tertiles of the APOL1 ChDir gene signature activation**  
402 **(n=1481 genes) in NEPTUNE AA and noAA participants.** Outcomes were time since kidney biopsy to a  
403 “Composite Event” of kidney failure or loss of 40% of eGFR, or to “Complete Remission”. Enrichr was used  
404 to obtain gene set enrichment analysis using the MSigDB Hallmark 2020 gene set (right panel and table).

405 **Figure 6. Principal Coordinate Analysis (PCoA) using the Euclidean distance matrices of podocyte (POD,**  
406 **1814 genes) and parietal epithelial cell (PEC, 1220 genes) identity gene signatures.** **Panel A** shows the  
407 two first coordinates and the separation of the centroids from noAA\_ORA, AA\_ORA, AA\_1RA and AA\_2RA  
408 NEPTUNE participants using the POD identity gene signature distance matrix. PERMANOVA analysis  
409 indicates that the centroids of these four groups are significantly separated ( $p \leq 0.024$ ). Post-test  
410 comparisons show that only the noAA\_ORA and AA\_2RA centroids are statistically different in this gene  
411 space ( $p \leq 0.048$ ). **Panel B** shows the first two coordinates of the same groups in the PEC identity signature  
412 gene distance matrix. PERMANOVA showed the group centroids were significantly separated ( $p \leq 0.001$ ).  
413 Post-test pairwise comparisons showed that the centroid from noAA\_ORA was significantly different from  
414 those from AA\_1RA ( $p \leq 0.012$ ) and AA\_2RA ( $p \leq 0.006$ ). Similarly, the centroid from AA\_ORA was different  
415 from those from AA\_1RA ( $p \leq 0.042$ ) and AA\_2RA ( $p \leq 0.018$ ). Most importantly, the centroids from AA\_ORA  
416 and noAA\_ORA or AA\_1RA and AA\_2RA were not significantly separated. Red ellipses indicate patients  
417 with APOL1 risk alleles *i.e.* AA\_2RA and AA\_1RA, while black indicates AA\_ORA and noAA\_ORA.

418 **Figure 7-A: Overlap analysis between genes in metamodules and cell exclusive gene signatures obtained**  
419 **from the Kidney Precision Medicine Project.** The total number of genes in each metamodule are  
420 presented in the “Genes” column. The number of cell-exclusive genes were as follows: POD, visceral  
421 epithelial cells (125 exclusive genes); PEC, parietal epithelial cells (26 exclusive genes); PT, proximal tubule  
422 cells (425 exclusive genes); DCT, distal convolute tubule cells (131 exclusive genes); SC, stromal cells (365  
423 exclusive genes); and IMN, immune cells (950 exclusive genes). Adjusted-Fisher exact test p-values are  
424 presented in the “p-Adj” column. Only, significant enrichments are presented in the table. Expression  
425 scores of MM2 (**Panel B**), MM4 (**Panel C**), and MM10 (**Panel D**) in glomerular cells of the adult human  
426 kidney. The gene spaces for each metamodule (437, 669 and 142 genes, respectively) were provided to  
427 compute aggregate expression scores across glomerular cell populations. Glomerular capillary  
428 endothelium (EC-GC), glomerular mesangium (MC).

429

430 **TABLES AND FIGURES**

**Table 1:**

|                           | <b>AA (72)</b>              | <b>noAA (152)</b>            | <b>p value</b> |
|---------------------------|-----------------------------|------------------------------|----------------|
| Sex male (%)              | 64% <sub>(46)</sub>         | 63% <sub>(95)</sub>          | <i>0.883</i>   |
| Pediatric (%)             | 42% <sub>(30)</sub>         | 36% <sub>(54)</sub>          | <i>0.380</i>   |
| Hypertension (%)          | 61% <sub>(44)</sub>         | 42% <sub>(64)</sub>          | <b>0.010</b>   |
| Diabetes (%)              | 4% <sub>(3)</sub>           | 7% <sub>(10)</sub>           | <i>0.057</i>   |
| Immunosuppression (%)     | 36% <sub>(26)</sub>         | 44% <sub>(67)</sub>          | <i>0.310</i>   |
| ACE/ARB (%)               | 32% <sub>(23)</sub>         | 33% <sub>(50)</sub>          | <i>1.000</i>   |
| Age at biopsy (years)     | 31 ± 21 <sub>(72)</sub>     | 34 ± 23 <sub>(152)</sub>     | <i>0.600</i>   |
| eGFR (mL/min/1.73m2)      | 76 ± 37 <sub>(70)</sub>     | 95 ± 43 <sub>(140)</sub>     | <b>0.001</b>   |
| UPCR_lg                   | 0.59 ± 0.36 <sub>(71)</sub> | 0.69 ± 0.37 <sub>(146)</sub> | <i>0.054</i>   |
| <b>Cohort (%)</b>         |                             |                              |                |
| FSGS                      | 49% <sub>(35)</sub>         | 34% <sub>(52)</sub>          | -              |
| MCD                       | 33% <sub>(24)</sub>         | 38% <sub>(58)</sub>          | -              |
| MN                        | 18% <sub>(13)</sub>         | 28% <sub>(42)</sub>          | -              |
| <b>Race (%)</b>           |                             |                              |                |
| Black/African American    | 85% <sub>(61)</sub>         | 0                            | -              |
| Multi-Racial              | 10% <sub>(7)</sub>          | 3% <sub>(5)</sub>            | -              |
| Unknown                   | 2.5% <sub>(2)</sub>         | 4% <sub>(6)</sub>            | -              |
| White/Caucasian           | 2.5% <sub>(2)</sub>         | 80% <sub>(121)</sub>         | -              |
| Asian/Asian American      | 0                           | 13% <sub>(19)</sub>          | -              |
| Hawaiian/Pacific Islander | 0                           | <1% <sub>(1)</sub>           | -              |
| <b>APOL1 genotype (%)</b> |                             |                              |                |
| G0/G0                     | 28% <sub>(20)</sub>         | 100% <sub>(152)</sub>        | -              |
| G0/G1                     | 26% <sub>(19)</sub>         | 0                            | -              |
| G0/G2                     | 15% <sub>(11)</sub>         | 0                            | -              |
| G1/G1                     | 10% <sub>(7)</sub>          | 0                            | -              |
| G1/G2                     | 15% <sub>(11)</sub>         | 0                            | -              |
| G2/G2                     | 6% <sub>(4)</sub>           | 0                            | -              |

**Figure 1:**

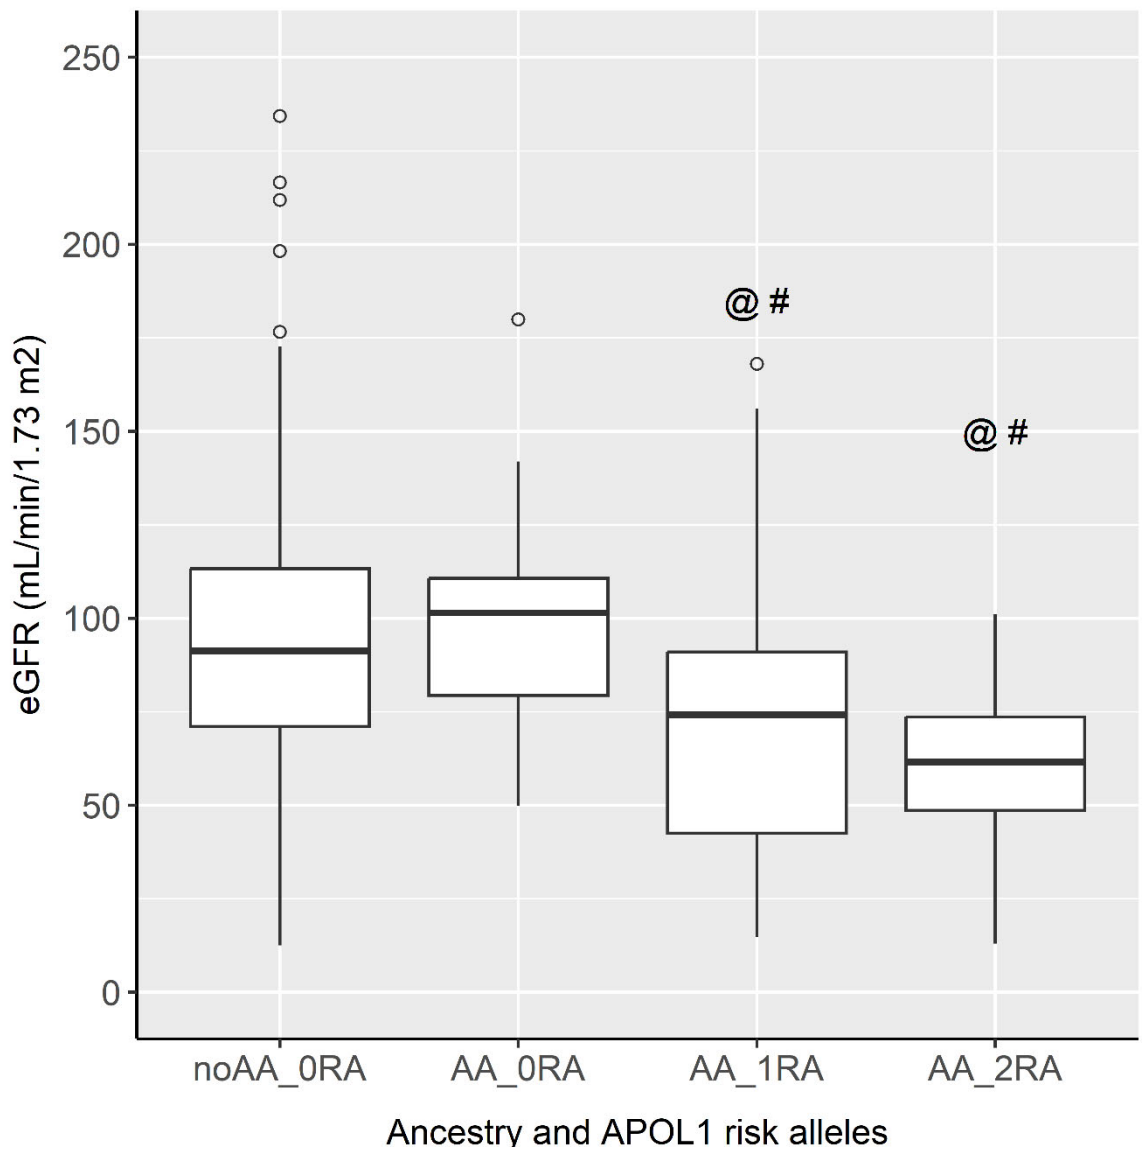

#: Significant vs. noAA\_0RA  
@: Significant vs. AA\_0RA

| Metamodule | Module        | Genes | ALL  |         |      |         |              | ALL eGFR/UPCR-Adjusted |         |      |         |              |
|------------|---------------|-------|------|---------|------|---------|--------------|------------------------|---------|------|---------|--------------|
|            |               |       | eGFR | UPCR_Ig | FSGS | APOL_RA | African_Anc. | eGFR                   | UPCR_Ig | FSGS | APOL_RA | African_Anc. |
| MM1        | Brown         | 1393  | ↗    | ↘       |      |         |              |                        |         |      |         |              |
|            | Green         | 730   | ↗    | ↘       |      |         |              |                        |         |      |         |              |
| MM2        | DarkTurquoise | 164   |      |         |      | ↗       | ↗            |                        |         |      |         | ↗            |
|            | Salmon        | 273   | ↘    |         |      | ↗       | ↗            | ↗                      |         |      | ↗       | ↗            |
| MM3        | Orange        | 151   | ↘    | ↗       |      |         |              |                        |         |      |         |              |
|            | Ivory         | 42    | ↘    | ↗       | ↗    |         |              |                        |         |      |         |              |
|            | Midnightblue  | 226   | ↘    | ↗       | ↗    | ↗       |              |                        |         |      | ↗       |              |
|            | Royalblue     | 184   | ↘    | ↗       |      |         |              |                        |         |      |         |              |
| MM4        | Cyan          | 230   | ↘    | ↗       |      |         |              |                        |         |      |         |              |
|            | Darkred       | 171   | ↘    | ↗       |      |         |              |                        |         |      |         |              |
|            | grey60        | 201   | ↘    | ↗       |      |         |              |                        |         |      |         |              |
|            | skyblue3      | 67    | ↘    |         |      |         |              |                        |         |      |         |              |
| MM5        |               |       |      |         |      |         |              |                        |         |      |         |              |
| MM6        |               |       |      |         |      |         |              |                        |         |      |         |              |
| MM7        |               |       |      |         |      |         |              |                        |         |      |         |              |
| MM8        | Lightcyan1    | 44    | ↘    | ↗       |      |         |              |                        |         |      |         |              |
| MM9        | MediumPurple3 | 51    | ↘    |         |      |         |              |                        |         |      |         |              |
|            | Purple        | 326   | ↘    |         |      |         |              |                        |         |      |         |              |
|            | Sienna3       | 81    |      |         |      | ↗       |              |                        |         |      |         |              |
| MM10       | DarkOrange    | 142   | ↗    |         |      | ↘       |              |                        |         |      | ↘       |              |
| MM11       | LightYellow   | 188   | ↗    |         |      |         |              |                        |         |      |         |              |
| MM12       | OrangeRed4    | 61    | ↗    |         |      |         |              |                        |         |      |         |              |

**Figure 2:**

## AA\_MM2 (437genes)

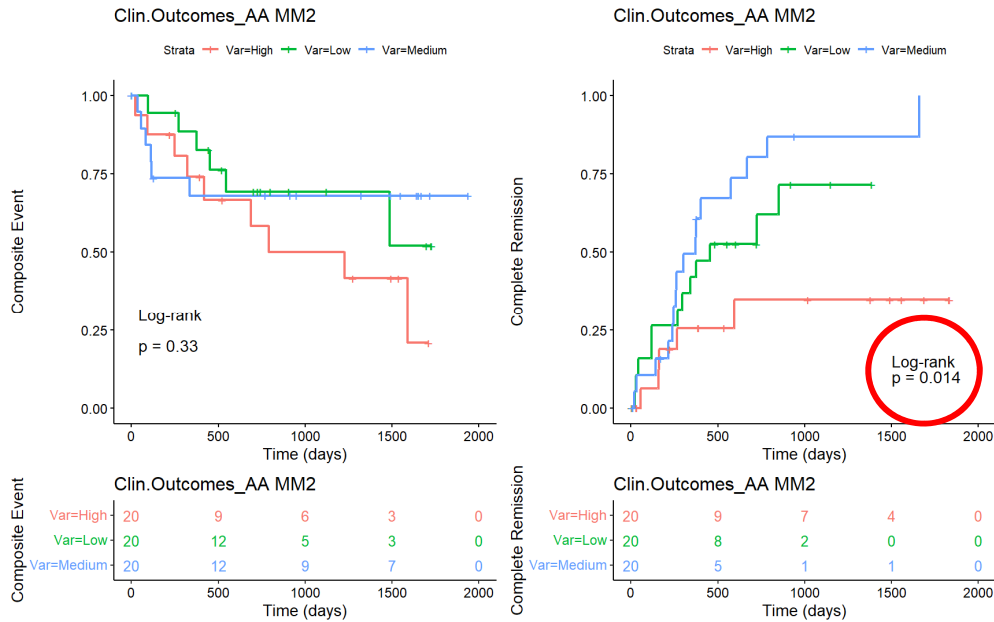

## noAA\_MM2 (437genes)

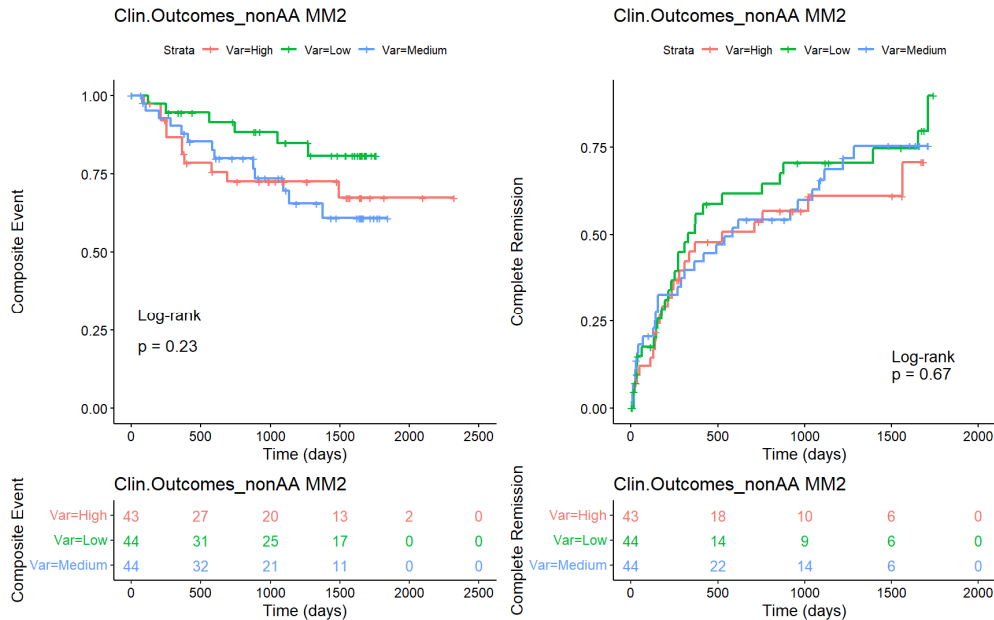

## EnrichR MSigDB Hallmark (473genes)

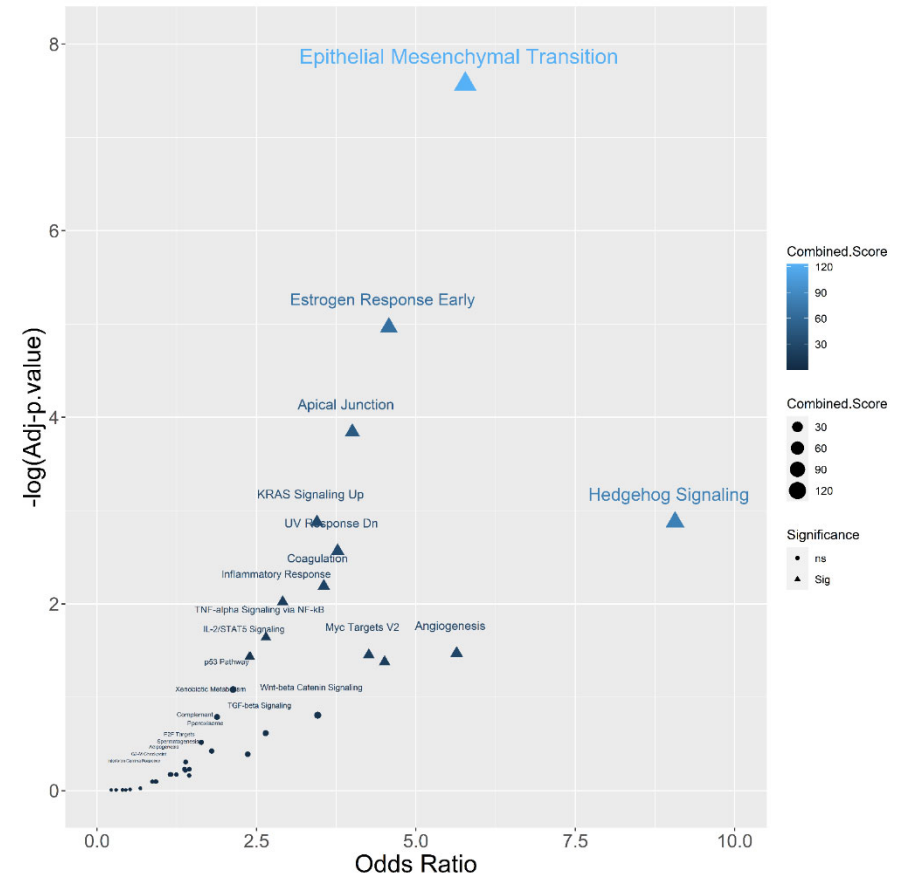

| MSigDB_Hallmark_2020 Term         | Overlap | p-non. | p-adj. | Odds Ratio | Combined Score |
|-----------------------------------|---------|--------|--------|------------|----------------|
| Epithelial Mesenchymal Transition | 22/200  | 5E-10  | <0.001 | 5.77       | 123            |
| Estrogen Response Early           | 18/200  | 4E-07  | <0.001 | 4.57       | 67             |
| Apical Junction                   | 16/200  | 9E-06  | <0.001 | 4.00       | 47             |
| Hedgehog Signaling                | 6/36    | 1E-04  | <0.01  | 9.06       | 82             |
| KRAS Signaling Up                 | 14/200  | 1E-04  | <0.01  | 3.45       | 31             |
| UV Response Dn                    | 11/144  | 3E-04  | <0.01  | 3.77       | 30             |
| Coagulation                       | 10/138  | 9E-04  | <0.01  | 3.56       | 25             |
| Inflammatory Response             | 12/200  | 2E-03  | <0.01  | 2.91       | 19             |
| Glycolysis                        | 11/200  | 5E-03  | <0.05  | 2.65       | 14             |
| TNF-alpha Signaling via NF-kB     | 11/200  | 5E-03  | <0.05  | 2.65       | 14             |

**Figure 3:**

**Figure 4:**

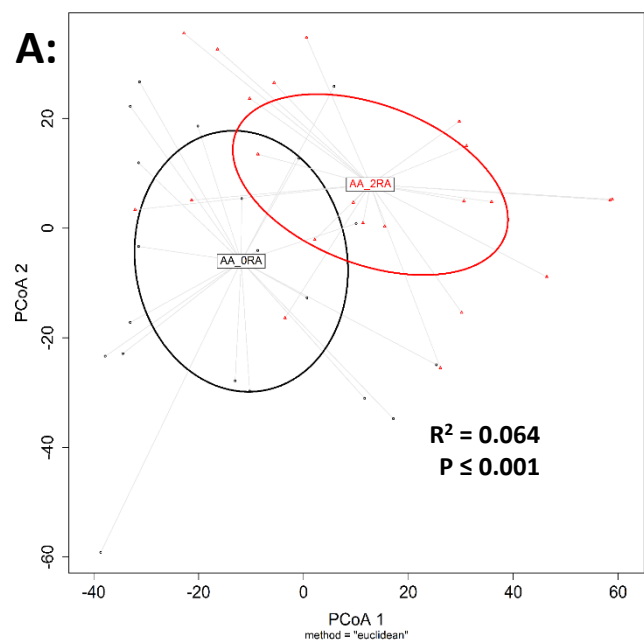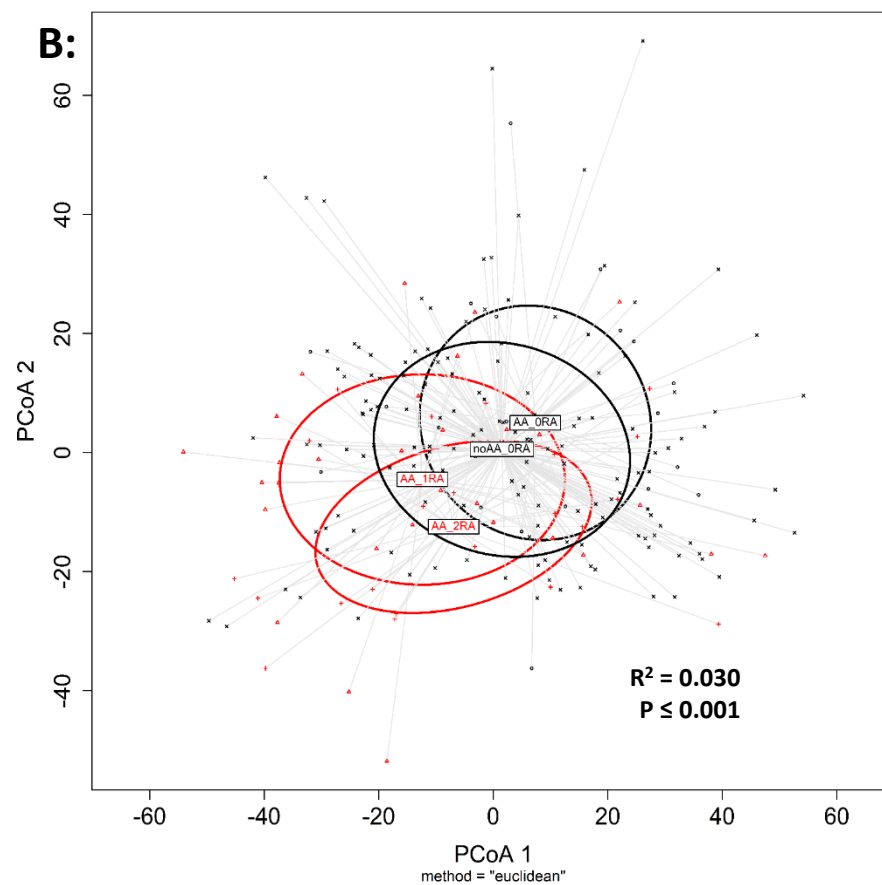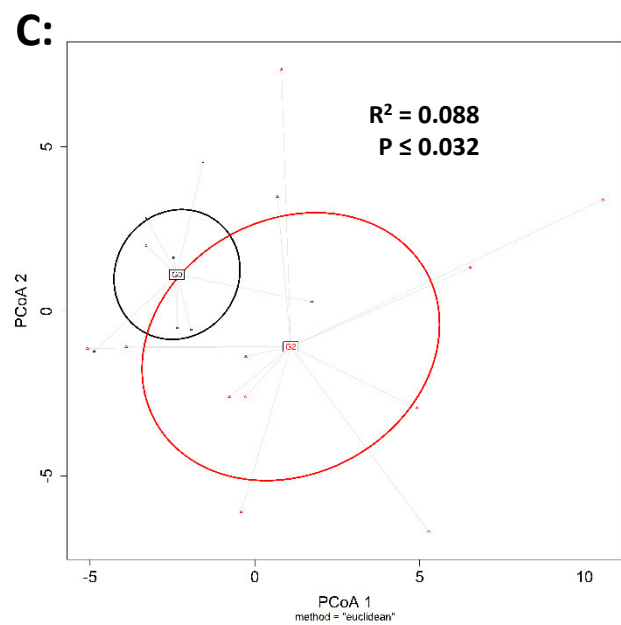

**Top-75%: 1481 genes**

| Pairs              | DF | R2   | pNom  | pAdj         |
|--------------------|----|------|-------|--------------|
| noAA_ORA vs AA_2RA | 1  | 1.7% | 0.001 | <b>0.006</b> |
| noAA_ORA vs AA_1RA | 1  | 1.2% | 0.001 | <b>0.006</b> |
| AA_ORA vs AA_2RA   | 1  | 6.4% | 0.001 | <b>0.006</b> |
| AA_ORA vs AA_1RA   | 1  | 3.8% | 0.004 | <b>0.024</b> |
| noAA_ORA vs AA_ORA | 1  | 0.9% | 0.043 | 0.26         |
| AA_1RA vs AA_2RA   | 1  | 2.5% | 0.076 | 0.46         |



## AA\_ChDir Top75% (1481 genes)

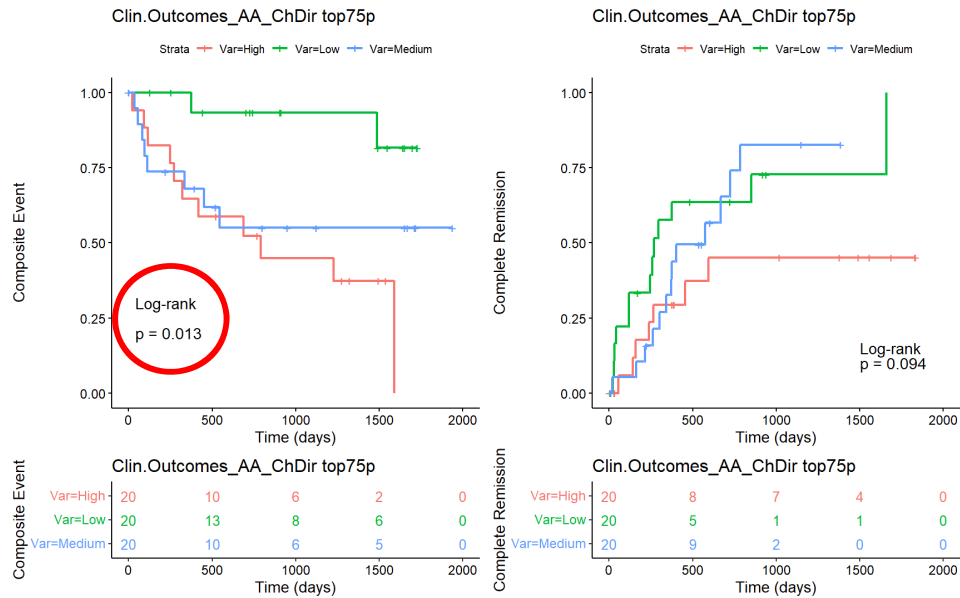

## noAA\_ChDir Top75% (1481 genes)

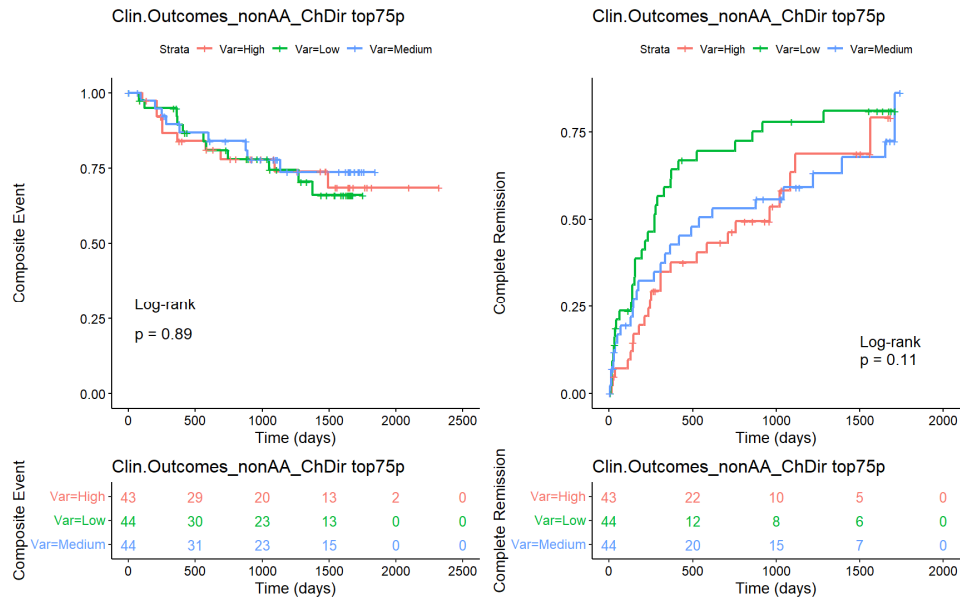

## EnrichR MSigDB Hallmark (1481genes)

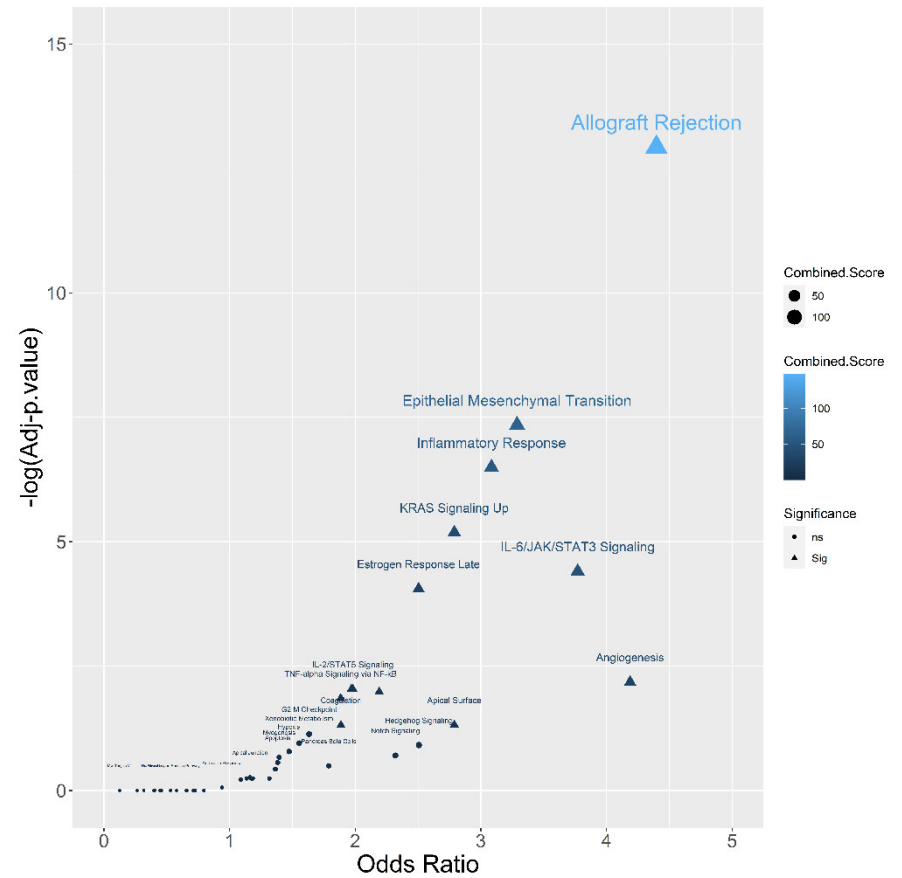

| MSigDB_Hallmark_2020 Term         | Overlap | p-non. | p-adj. | Odds Ratio | Combined Score |
|-----------------------------------|---------|--------|--------|------------|----------------|
| Allograft Rejection               | 51/200  | 2E-15  | <0.001 | 4.4        | 148            |
| Epithelial Mesenchymal Transition | 41/200  | 2E-09  | <0.001 | 3.3        | 66             |
| Inflammatory Response             | 39/200  | 2E-08  | <0.001 | 3.1        | 55             |
| KRAS Signaling Up                 | 36/200  | 6E-07  | <0.001 | 2.8        | 40             |
| IL-6/JAK/STAT3 Signaling          | 20/87   | 4E-06  | <0.001 | 3.8        | 47             |
| Estrogen Response Late            | 33/200  | 1E-05  | <0.001 | 2.5        | 29             |
| Angiogenesis                      | 9/36    | 1E-03  | <0.01  | 4.2        | 29             |
| IL-2/STAT5 Signaling              | 27/199  | 2E-03  | <0.01  | 2.0        | 13             |
| Estrogen Response Early           | 27/200  | 2E-03  | <0.01  | 2.0        | 12             |
| Spermatogenesis                   | 20/135  | 2E-03  | <0.05  | 2.2        | 13             |

Figure 5:



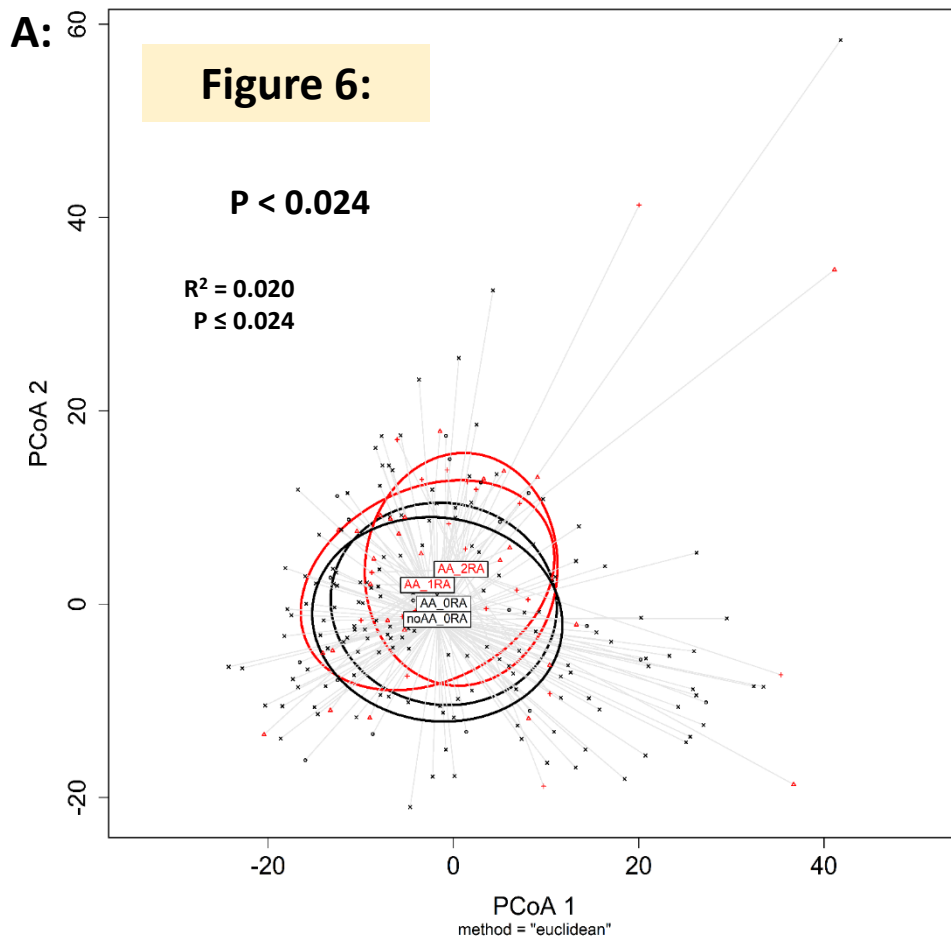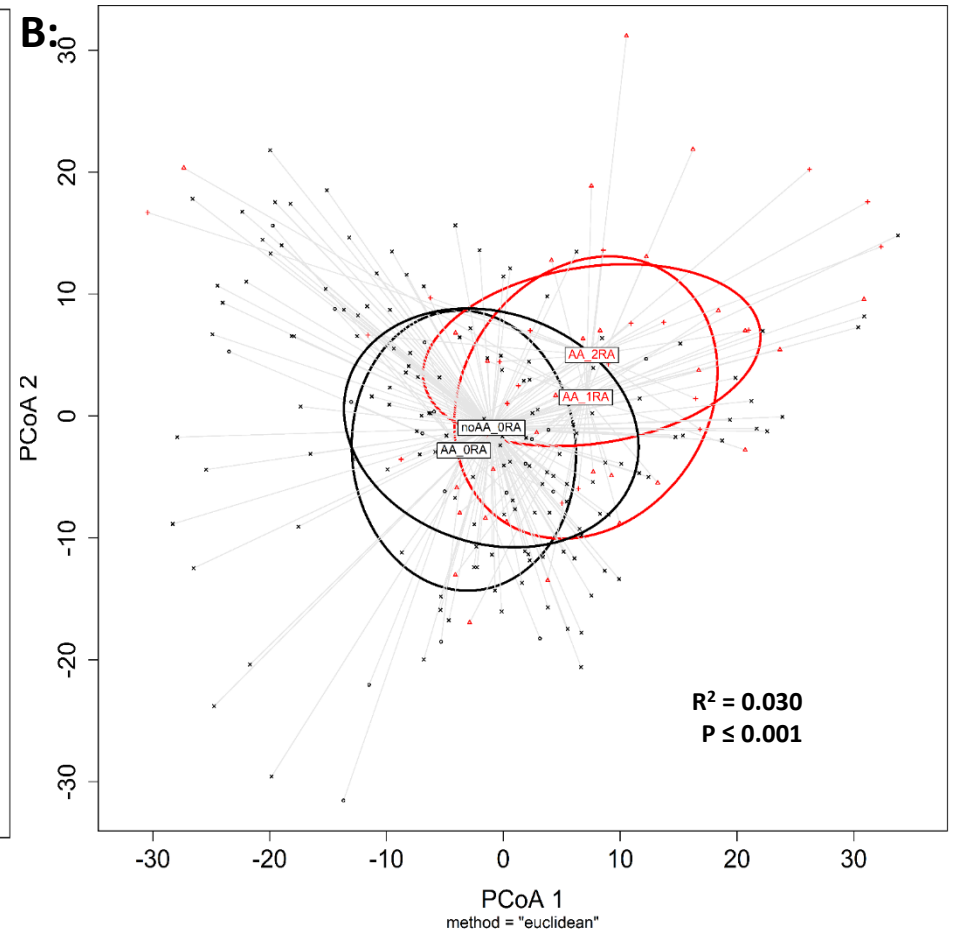

**POD : 1814 genes**

| Pairs              | DF | R2   | pNom  | pAdj         |
|--------------------|----|------|-------|--------------|
| AA_2RA vs AA_0RA   | 1  | 3.0% | 0.18  | 1.00         |
| AA_2RA vs noAA_0RA | 1  | 1.4% | 0.008 | <b>0.048</b> |
| AA_1RA vs AA_0RA   | 1  | 1.3% | 0.91  | 1.00         |
| AA_1RA vs noAA_0RA | 1  | 1.0% | 0.06  | 0.34         |
| AA_1RA vs AA_2RA   | 1  | 1.8% | 0.50  | 1.00         |
| AA_0RA vs noAA_0RA | 1  | 0.5% | 0.52  | 1.00         |

**PEC : 1220 genes**

| Pairs              | DF | R2   | pNom  | pAdj         |
|--------------------|----|------|-------|--------------|
| AA_2RA vs AA_0RA   | 1  | 6.9% | 0.003 | <b>0.018</b> |
| AA_2RA vs noAA_0RA | 1  | 1.9% | 0.001 | <b>0.006</b> |
| AA_1RA vs AA_0RA   | 1  | 4.6% | 0.007 | <b>0.042</b> |
| AA_1RA vs noAA_0RA | 1  | 1.4% | 0.002 | <b>0.012</b> |
| AA_1RA vs AA_2RA   | 1  | 1.5% | 0.79  | 1.00         |
| AA_0RA vs noAA_0RA | 1  | 0.7% | 0.31  | 1.00         |

Figure 7:

**A:**

| Metamodule | Genes | Module                                       | Cell Type | Overlapping Genes (#) | p-Adj.              |
|------------|-------|----------------------------------------------|-----------|-----------------------|---------------------|
| MM1        | 4270  | Brown<br>Green                               | PT        | 301                   | $1 \times 10^{-49}$ |
| MM2        | 437   | DarkTurquoise<br>Salmon                      | PEC       | 6                     | $1 \times 10^{-3}$  |
| MM3        | 603   | Orange<br>Ivory<br>Midnightblue<br>Royalblue | STM       | 44                    | $2 \times 10^{-9}$  |
| MM4        | 669   | Cyan<br>Darkred<br>grey60<br>skyblue3        | POD       | 22                    | $2 \times 10^{-7}$  |
| MM5        |       |                                              |           |                       |                     |
| MM6        |       |                                              |           |                       |                     |
| MM7        |       |                                              |           |                       |                     |
| MM8        | 1041  | Lightcyan1                                   |           |                       |                     |
| MM9        | 1251  | MediumPurple3<br>Purple<br>Sienna3           | INM       | 273                   | $1 \times 10^{-49}$ |
| MM10       | 142   | DarkOrange                                   | POD       | 13                    | $3 \times 10^{-9}$  |
| MM11       | 376   | LightYellow                                  |           |                       |                     |
| MM12       | 3313  | OrangeRed4                                   | DCT       | 47                    | $5 \times 10^{-3}$  |

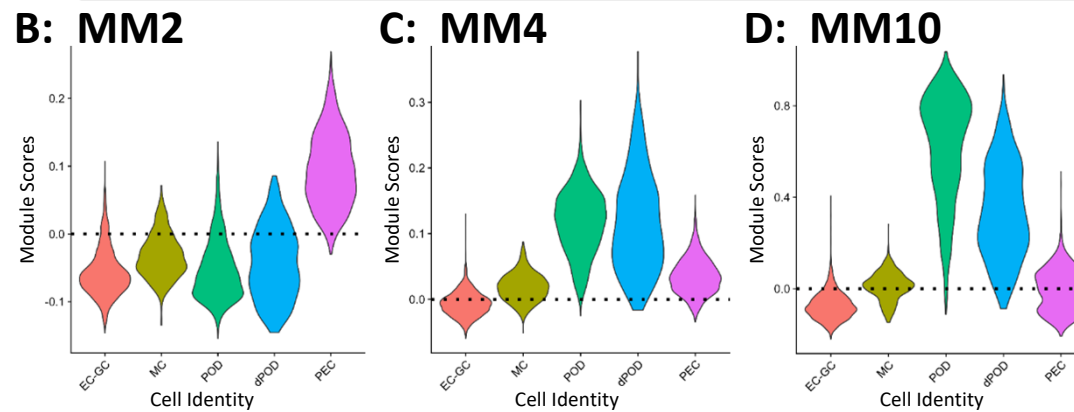

431 REFERENCES

- 432 1. Gupta, Y., et al., *Strong protective effect of the APOL1 p.N264K variant against G2-associated focal*  
433 *segmental glomerulosclerosis and kidney disease*. Nat Commun, 2023. **14**(1): p. 7836.
- 434 2. Lannon, H., et al., *Apolipoprotein L1 (APOL1) risk variant toxicity depends on the haplotype*  
435 *background*. Kidney Int, 2019. **96**(6): p. 1303-1307.
- 436 3. Winkler, R.L., et al., *Cation Channel Activity of Apolipoprotein L1 is Modulated by Haplotype*  
437 *Background*. J Am Soc Nephrol, 2022. **33**(9): p. 1673-1675.
- 438 4. Pollak, M.R. and D.J. Friedman, *APOL1 and APOL1-Associated Kidney Disease: A Common Disease,*  
439 *an Unusual Disease Gene - Proceedings of the Henry Shavelle Professorship*. Glomerular Dis, 2023.  
440 **3**(1): p. 75-87.
- 441 5. Olabisi, O.A., et al., *APOL1 kidney disease risk variants cause cytotoxicity by depleting cellular*  
442 *potassium and inducing stress-activated protein kinases*. Proc Natl Acad Sci U S A, 2016. **113**(4):  
443 p. 830-7.
- 444 6. Datta, S., et al., *Kidney Disease-Associated APOL1 Variants Have Dose-Dependent, Dominant Toxic*  
445 *Gain-of-Function*. J Am Soc Nephrol, 2020. **31**(9): p. 2083-2096.
- 446 7. Giovinazzo, J.A., et al., *Apolipoprotein L-1 renal risk variants form active channels at the plasma*  
447 *membrane driving cytotoxicity*. Elife, 2020. **9**: p. e51185.
- 448 8. Datta, S., et al., *APOL1-mediated monovalent cation transport contributes to APOL1-mediated*  
449 *podocytopathy in kidney disease*. J Clin Invest, 2024. **134**(5).
- 450 9. Hung, A.M., et al., *Genetic Inhibition of APOL1 Pore-Forming Function Prevents APOL1-Mediated*  
451 *Kidney Disease*. J Am Soc Nephrol, 2023. **34**(11): p. 1889-1899.
- 452 10. Beckerman, P., et al., *Transgenic expression of human APOL1 risk variants in podocytes induces*  
453 *kidney disease in mice*. Nat Med, 2017. **23**(4): p. 429-438.
- 454 11. Aghajan, M., et al., *Antisense oligonucleotide treatment ameliorates IFN-gamma-induced*  
455 *proteinuria in APOL1-transgenic mice*. JCI Insight, 2019. **4**(12).
- 456 12. McCarthy, G.M., et al., *Recessive, gain-of-function toxicity in an APOL1 BAC transgenic mouse*  
457 *model mirrors human APOL1 kidney disease*. Dis Model Mech, 2021. **14**(8).
- 458 13. Liu, E., et al., *Profiling APOL1 Nephropathy Risk Variants in Genome-Edited Kidney Organoids with*  
459 *Single-Cell Transcriptomics*. Kidney360, 2020. **1**(3): p. 203-215.
- 460 14. McNulty, M.T., et al., *A glomerular transcriptomic landscape of apolipoprotein L1 in Black patients*  
461 *with focal segmental glomerulosclerosis*. Kidney Int, 2022. **102**(1): p. 136-148.
- 462 15. Hodgins, J.B., et al., *Quantification of Glomerular Structural Lesions: Associations With Clinical*  
463 *Outcomes and Transcriptomic Profiles in Nephrotic Syndrome*. Am J Kidney Dis, 2022. **79**(6): p.  
464 807-819 e1.
- 465 16. Adeyemo, A., et al., *HLA-DQA1 and APOL1 as Risk Loci for Childhood-Onset Steroid-Sensitive and*  
466 *Steroid-Resistant Nephrotic Syndrome*. Am J Kidney Dis, 2018. **71**(3): p. 399-406.
- 467 17. Chen, D.P., et al., *Kidney Disease Progression in Membranous Nephropathy among Black*  
468 *Participants with High-Risk APOL1 Genotype*. Clin J Am Soc Nephrol, 2023. **18**(3): p. 337-343.
- 469 18. Gribouval, O., et al., *Identification of genetic causes for sporadic steroid-resistant nephrotic*  
470 *syndrome in adults*. Kidney Int, 2018. **94**(5): p. 1013-1022.
- 471 19. Gribouval, O., et al., *APOL1 risk genotype in European steroid-resistant nephrotic syndrome and/or*  
472 *focal segmental glomerulosclerosis patients of different African ancestries*. Nephrol Dial  
473 Transplant, 2019. **34**(11): p. 1885-1893.
- 474 20. Mohottige, D., et al., *Residential Structural Racism and Prevalence of Chronic Health Conditions*.  
475 JAMA Netw Open, 2023. **6**(12): p. e2348914.
- 476 21. Barral-Arca, R., et al., *Ancestry patterns inferred from massive RNA-seq data*. RNA, 2019. **25**(7): p.  
477 857-868.

- 478 22. Cole, S.W., et al., *Population-based RNA profiling in Add Health finds social disparities in*  
479 *inflammatory and antiviral gene regulation to emerge by young adulthood.* Proc Natl Acad Sci U  
480 S A, 2020. **117**(9): p. 4601-4608.
- 481 23. Price, A.L., et al., *Effects of cis and trans genetic ancestry on gene expression in African Americans.*  
482 PLoS Genet, 2008. **4**(12): p. e1000294.
- 483 24. Kachuri, L., et al., *Gene expression in African Americans, Puerto Ricans and Mexican Americans*  
484 *reveals ancestry-specific patterns of genetic architecture.* Nat Genet, 2023. **55**(6): p. 952-963.
- 485 25. Catalina, M.D., et al., *Patient ancestry significantly contributes to molecular heterogeneity of*  
486 *systemic lupus erythematosus.* JCI Insight, 2020. **5**(15).
- 487 26. Yang, W., et al., *Association of kidney disease outcomes with risk factors for CKD: findings from*  
488 *the Chronic Renal Insufficiency Cohort (CRIC) study.* Am J Kidney Dis, 2014. **63**(2): p. 236-43.
- 489 27. Clark, N.R., et al., *The characteristic direction: a geometrical approach to identify differentially*  
490 *expressed genes.* BMC Bioinformatics, 2014. **15**: p. 79.
- 491 28. Bruggeman, L.A., et al., *APOL1-G0 protects podocytes in a mouse model of HIV-associated*  
492 *nephropathy.* PLoS One, 2019. **14**(10): p. e0224408.
- 493 29. Bruggeman, L.A., et al., *APOL1-G0 or APOL1-G2 Transgenic Models Develop Preeclampsia but Not*  
494 *Kidney Disease.* J Am Soc Nephrol, 2016. **27**(12): p. 3600-3610.
- 495 30. Madhavan, S.M., et al., *APOL1 localization in normal kidney and nondiabetic kidney disease.* J Am  
496 Soc Nephrol, 2011. **22**(11): p. 2119-28.
- 497 31. Sampson, M.G., et al., *Integrative Genomics Identifies Novel Associations with APOL1 Risk*  
498 *Genotypes in Black NEPTUNE Subjects.* J Am Soc Nephrol, 2016. **27**(3): p. 814-23.
- 499 32. Madhavan, S.M., et al., *APOL1 variants change C-terminal conformational dynamics and binding*  
500 *to SNARE protein VAMP8.* JCI Insight, 2017. **2**(14).
- 501 33. Ma, L., et al., *Localization of APOL1 protein and mRNA in the human kidney: nondiseased tissue,*  
502 *primary cells, and immortalized cell lines.* J Am Soc Nephrol, 2015. **26**(2): p. 339-48.
- 503 34. Bronstein, R., et al., *Podocyte-Parietal Epithelial Cell Interdependence in Glomerular Development*  
504 *and Disease.* J Am Soc Nephrol, 2023. **34**(5): p. 737-750.
- 505 35. Nagata, M., *Podocyte injury and its consequences.* Kidney Int, 2016. **89**(6): p. 1221-30.
- 506 36. Gujarati, N.A., A.K. Chow, and S.K. Mallipattu, *Central role of podocytes in mediating cellular cross*  
507 *talk in glomerular health and disease.* Am J Physiol Renal Physiol, 2024. **326**(3): p. F313-F325.
- 508 37. Smeets, B., et al., *Tracing the origin of glomerular extracapillary lesions from parietal epithelial*  
509 *cells.* J Am Soc Nephrol, 2009. **20**(12): p. 2604-15.
- 510 38. Kuppe, C., et al., *Common histological patterns in glomerular epithelial cells in secondary focal*  
511 *segmental glomerulosclerosis.* Kidney Int, 2015. **88**(5): p. 990-8.
- 512 39. Miesen, L., E. Steenbergen, and B. Smeets, *Parietal cells-new perspectives in glomerular disease.*  
513 Cell Tissue Res, 2017. **369**(1): p. 237-244.
- 514 40. Li, Z.H., et al., *The Role of Parietal Epithelial Cells in the Pathogenesis of Podocytopathy.* Front  
515 Physiol, 2022. **13**: p. 832772.
- 516 41. Smeets, B., et al., *Parietal epithelial cells participate in the formation of sclerotic lesions in focal*  
517 *segmental glomerulosclerosis.* J Am Soc Nephrol, 2011. **22**(7): p. 1262-74.
- 518 42. Pace, J.A., et al., *Podocyte-specific KLF4 is required to maintain parietal epithelial cell quiescence*  
519 *in the kidney.* Sci Adv, 2021. **7**(36): p. eabg6600.
- 520 43. Romoli, S., et al., *CXCL12 blockade preferentially regenerates lost podocytes in cortical nephrons*  
521 *by targeting an intrinsic podocyte-progenitor feedback mechanism.* Kidney Int, 2018. **94**(6): p.  
522 1111-1126.
- 523 44. Djudjaj, S., et al., *Macrophage Migration Inhibitory Factor Mediates Proliferative GN via CD74.* J  
524 Am Soc Nephrol, 2016. **27**(6): p. 1650-64.

- 525 45. Freedman, B.I., et al., *APOL1 at 10 years: progress and next steps*. *Kidney Int*, 2021. **99**(6): p. 1296-  
526 1302.
- 527 46. Juliar, B.A., et al., *Interferon-gamma induces combined pyroptotic angiopathy and APOL1*  
528 *expression in human kidney disease*. *Cell Rep*, 2024. **43**(6): p. 114310.
- 529 47. Uzureau, S., et al., *APOL1 C-Terminal Variants May Trigger Kidney Disease through Interference*  
530 *with APOL3 Control of Actomyosin*. *Cell Rep*, 2020. **30**(11): p. 3821-3836 e13.
- 531 48. Kumar, V., et al., *Disrupted apolipoprotein L1-miR193a axis dedifferentiates podocytes through*  
532 *autophagy blockade in an APOL1 risk milieu*. *Am J Physiol Cell Physiol*, 2019. **317**(2): p. C209-c225.
- 533 49. Nystrom, S.E., et al., *JAK inhibitor blocks COVID-19 cytokine-induced JAK/STAT/APOL1 signaling in*  
534 *glomerular cells and podocytopathy in human kidney organoids*. *JCI Insight*, 2022. **7**(11).
- 535 50. Kumar, V., et al., *Role of Apolipoprotein L1 in Human Parietal Epithelial Cell Transition*. *Am J Pathol*,  
536 2018. **188**(11): p. 2508-2528.
- 537 51. Genovese, G., et al., *Association of trypanolytic ApoL1 variants with kidney disease in African*  
538 *Americans*. *Science*, 2010. **329**(5993): p. 841-5.
- 539 52. Kopp, J.B., et al., *APOL1 genetic variants in focal segmental glomerulosclerosis and HIV-associated*  
540 *nephropathy*. *J Am Soc Nephrol*, 2011. **22**(11): p. 2129-37.
- 541 53. Elliott, M.D., et al., *Clinical and Genetic Characteristics of CKD Patients with High-Risk APOL1*  
542 *Genotypes*. *J Am Soc Nephrol*, 2023. **34**(5): p. 909-919.
- 543 54. Kruzel-Davila, E., et al., *HIV Viremia Is Associated With APOL1 Variants and Reduced JC-Viruria*.  
544 *Front Med (Lausanne)*, 2021. **8**: p. 718300.
- 545 55. Gbadegesin, R.A., et al., *APOL1 Bi- and Monoallelic Variants and Chronic Kidney Disease in West*  
546 *Africans*. *N Engl J Med*, 2024.
- 547 56. Zhang, D.Y., et al., *Protein-truncating variant in APOL3 increases chronic kidney disease risk in*  
548 *epistasis with APOL1 risk alleles*. *JCI Insight*, 2024. **9**(19).
- 549 57. Gbadegesin, R., et al., *APOL1 Genotyping Is Incomplete without Testing for the Protective M1*  
550 *Modifier p.N264K Variant*. *Glomerular Dis*, 2024. **4**(1): p. 43-48.
- 551 58. Li, C. and K. Susztak, *Genetic Insights into Blood Pressure From Kidney Multi-Omics*. *Am J Kidney*  
552 *Dis*, 2024.
- 553 59. Langfelder, P. and S. Horvath, *Fast R Functions for Robust Correlations and Hierarchical Clustering*.  
554 *J Stat Softw*, 2012. **46**(11).
- 555 60. Langfelder, P. and S. Horvath, *WGCNA: an R package for weighted correlation network analysis*.  
556 *BMC Bioinformatics*, 2008. **9**: p. 559.
- 557 61. Tao, J., et al., *JAK-STAT signaling is activated in the kidney and peripheral blood cells of patients*  
558 *with focal segmental glomerulosclerosis*. *Kidney Int*, 2018. **94**(4): p. 795-808.
- 559 62. Menon, R., et al., *Single cell transcriptomics identifies focal segmental glomerulosclerosis*  
560 *remission endothelial biomarker*. *JCI Insight*, 2020. **5**(6).
- 561 63. Kuleshov, M.V., et al., *Enrichr: a comprehensive gene set enrichment analysis web server 2016*  
562 *update*. *Nucleic Acids Res*, 2016. **44**(W1): p. W90-7.
- 563 64. Chen, E.Y., et al., *Enrichr: interactive and collaborative HTML5 gene list enrichment analysis tool*.  
564 *BMC Bioinformatics*, 2013. **14**: p. 128.
- 565 65. Liberzon, A., et al., *The Molecular Signatures Database (MSigDB) hallmark gene set collection*. *Cell*  
566 *Syst*, 2015. **1**(6): p. 417-425.
- 567 66. *MSigDB Collections: Details and Acknowledgments*. Available from: [http://www.gsea-  
568 msigdb.org/gsea/msigdb/collection\\_details.jsp#H](http://www.gsea-msigdb.org/gsea/msigdb/collection_details.jsp#H).
- 569 67. Gonzalez-Vicente, A., J.L. Garvin, and U. Hopfer, *Transcriptome signature for dietary fructose-*  
570 *specific changes in rat renal cortex: A quantitative approach to physiological relevance*. *PLoS One*,  
571 2018. **13**(8): p. e0201293.



- 572 68. Piret, S.E., et al., *Loss of proximal tubular transcription factor Kruppel-like factor 15 exacerbates*  
573 *kidney injury through loss of fatty acid oxidation*. *Kidney Int*, 2021. **100**(6): p. 1250-1267.
- 574 69. Guo, Y., et al., *Podocyte-Specific Induction of Kruppel-Like Factor 15 Restores Differentiation*  
575 *Markers and Attenuates Kidney Injury in Proteinuric Kidney Disease*. *J Am Soc Nephrol*, 2018.  
576 **29**(10): p. 2529-2545.
- 577 70. Ioannou, I., et al., *Signatures of Co-Deregulated Genes and Their Transcriptional Regulators in*  
578 *Kidney Cancers*. *Int J Mol Sci*, 2023. **24**(7).
- 579 71. Anderson, M.J., *Permutational Multivariate Analysis of Variance (PERMANOVA)*, in *Wiley StatsRef:*  
580 *Statistics Reference Online*. 2017. p. 1-15.
- 581 72. McArdle, B.H. and M.J. Anderson, *Fitting Multivariate Models to Community Data: A Comment on*  
582 *Distance-Based Redundancy Analysis*. *Ecology*, 2001. **82**(1): p. 290-297.
- 583 73. Oksanen, J., et al., *vegan: Community Ecology Package*. *R package version 2.5-7*. 2020: CRAN.R-  
584 project.
- 585 74. Zapala, M.A. and N.J. Schork, *Multivariate regression analysis of distance matrices for testing*  
586 *associations between gene expression patterns and related variables*. *Proc Natl Acad Sci U S A*,  
587 2006. **103**(51): p. 19430-5.
- 588 75. Martinez Arbizu, P. *pairwiseAdonis: Pairwise multilevel comparison using adonis*. *R package*  
589 *version 0.4*. 2020; Available from: <https://github.com/pmartinezarbizu/pairwiseAdonis>.

590

## Supplemental Materials

### ANALYSIS OF GLOMERULAR TRANSCRIPTOMES FROM NEPHROTIC PATIENTS SUGGEST

#### *APOL1* RISK VARIANTS IMPACT PARIETAL EPITHELIAL CELLS

Agustin Gonzalez-Vicente<sup>1,2</sup>, Dana C. Crawford<sup>3,4,5</sup>, William S. Bush<sup>3,4,5</sup>, Zhenzhen Wu<sup>6</sup>, Leslie A. Bruggeman<sup>2,6</sup>, Viji Nair<sup>7,8</sup>, Felix Eichinger<sup>7,8</sup>, Oliver Wessely<sup>9</sup>, Matthias Kretzler<sup>7,8</sup>, John F. O'Toole<sup>2,6</sup>, John R. Sedor<sup>1,2,6</sup>, for the Kidney Precision Medicine Project<sup>10</sup> and the Nephrotic Syndrome Study Network<sup>11</sup>

- 1- Department of Physiology and Biophysics, Case Western Reserve University School of Medicine, Cleveland, Ohio.
- 2- Department of Kidney Medicine, Medical Specialties, Cleveland Clinic Cleveland, Ohio.
- 3- Department of Population and Quantitative Health Sciences, Case Western Reserve University, Cleveland, OH
- 4- Cleveland Institute for Computational Biology, Case Western Reserve University, Cleveland, OH
- 5- Department of Genetics and Genome Sciences, Case Western Reserve University, Cleveland, OH
- 6- Department of Inflammation and Immunity, Lerner Research Institute, Cleveland Clinic, Cleveland, Ohio
- 7- Department of Medicine, Division of Nephrology, University of Michigan, Ann Arbor, MI,
- 8- Department of Computational Medicine and Bioinformatics, University of Michigan, Ann Arbor, MI
- 9- Department of Cardiovascular and Metabolic Sciences, Lerner Research Institute, Cleveland Clinic, Cleveland, Ohio
- 10- Members of the Kidney Precision Medicine Project are listed in the Appendix.
- 11- Members of the Nephrotic Syndrome Study Network are listed in the Appendix.



## **TABLE OF CONTENTS**

|                                            | <b>Pages</b>              |
|--------------------------------------------|---------------------------|
| <b>1. Supplemental Acknowledgements</b>    |                           |
| • NEPTUNE Study                            | 3-4                       |
| • Kidney Precision Medicine Project (KPMP) | 4-5                       |
| <b>2. Supplemental Figure Legends</b>      | 6                         |
| • Supplemental Figure 1:                   | 7                         |
| • Supplemental Figure 2:                   | 8                         |
| • Supplemental Figure 3:                   | 9                         |
| • Supplemental Figure 4:                   | 10                        |
| • Supplemental Figure 5:                   | 11                        |
| • Supplemental Figure 6:                   | 12                        |
| <b>3. Supplemental Tables Legends</b>      | 13                        |
| • Supplemental Table 1                     | 14                        |
| • Supplemental Table 2                     | (Provided as *.csv file)  |
| • Supplemental Table 3                     | (Provided as *.xlsx file) |
| • Supplemental Table 4                     | (Provided as *.xlsx file) |
| • Supplemental Table 5                     | 15                        |
| <b>4. Extended Methods</b>                 | 16-19                     |
| <b>5. Supplemental References</b>          | 20-21                     |

## **SUPPLEMENTAL ACKNOWLEDGEMENTS**

### **For NEPTUNE:**

The Nephrotic Syndrome Study Network (NEPTUNE) is part of the Rare Diseases Clinical Research Network (RDCRN), which is funded by the National Institutes of Health (NIH) and led by the National Center for Advancing Translational Sciences (NCATS) through its Division of Rare Diseases Research Innovation (DRDRI). NEPTUNE is funded under grant number U54DK083912 as a collaboration between NCATS and the National Institute of Diabetes and Digestive and Kidney Diseases (NIDDK). Additional funding and/or programmatic support is provided by the University of Michigan, NephCure Kidney International, Alport Syndrome Foundation, and the Halpin Foundation. RDCRN consortia are supported by the RDCRN Data Management and Coordinating Center (DMCC), funded by NCATS and the National Institute of Neurological Disorders and Stroke (NINDS) under U2CTR002818.

### **Members of the Nephrotic Syndrome Study Network (NEPTUNE):**

#### **NEPTUNE Collaborating Sites**

*Atrium Health Levine Children's Hospital, Charlotte, SC:* Susan Massengill<sup>\*</sup>, Layla Lo<sup>#</sup>  
*Cleveland Clinic, Cleveland, OH:* Katherine Dell<sup>\*</sup>, John O'Toole<sup>\*</sup>, John Sedor<sup>\*\*</sup>, Victoria Grange<sup>#</sup>  
*Children's Hospital, Los Angeles, CA:* Ian Macumber<sup>\*</sup>, Alyssa Parry<sup>#</sup>  
*Children's Mercy Hospital, Kansas City, MO:* Tarak Srivastava<sup>\*</sup>, Kelsey Markus<sup>#</sup>  
*Cohen Children's Hospital, New Hyde Park, NY:* Christine Sethna<sup>\*</sup>, Suzanne Vento<sup>#</sup>  
*Columbia University, New York, NY:* Pietro Canetta<sup>\*</sup>  
*Duke University Medical Center, Durham, NC:* Opeyemi Olabisi<sup>\*</sup>, Rasheed Gbadegesin<sup>\*\*</sup>, Maurice Smith<sup>#</sup>  
*Emory University, Atlanta, GA:* Laurence Greenbaum<sup>\*</sup>, Chia-shi Wang<sup>\*</sup>, Emily Yun<sup>#</sup>  
*The Lundquist Institute, Torrance, CA:* Sharon Adler<sup>\*</sup>, Janine LaPage<sup>#</sup>  
*John H Stroger Cook County Hospital, Chicago, IL:* Amatur Amarah<sup>\*</sup>  
*Johns Hopkins Medicine, Baltimore, MD:* Meredith Atkinson<sup>\*</sup>, Sara Boynton<sup>#</sup>  
*Mayo Clinic, Rochester, MN:* John Lieske, Marie Hogan, Fernando Ferverza  
*Medical University of South Carolina, Charleston, SC:* David Selewski<sup>\*</sup>, Cheryl Alston<sup>#</sup>  
*Montefiore Medical Center, Bronx, NY:* Kim Reidy<sup>\*</sup>, Michael Ross<sup>\*</sup>, Frederick Kaskel<sup>\*\*</sup>, Patricia Flynn<sup>#</sup>  
*New York University Medical Center, New York, NY:* Laura Malaga-Diequez<sup>\*</sup>, Olga Zhdanova<sup>\*\*</sup>, Laura Jane Pehrson<sup>#</sup>, Melanie Miranda<sup>#</sup>  
*The Ohio State University College of Medicine, Columbus, OH:* Salem Almaani<sup>\*</sup>, Laci Roberts<sup>#</sup>  
*Stanford University, Stanford, CA:* Richard Lafayette<sup>\*</sup>, Shiktij Dave<sup>#</sup>  
*Temple University, Philadelphia, PA:* Iris Lee<sup>\*\*</sup>  
*Texas Children's Hospital at Baylor College of Medicine, Houston, TX:* Shweta Shah<sup>\*</sup>, Sadaf Batla<sup>#</sup>  
*University Health Network Toronto:* Heather Reich<sup>\*</sup>, Michelle Hladunewich<sup>\*\*</sup>, Paul Ling<sup>#</sup>, Martin Romano<sup>#</sup>  
*University of California at San Francisco, San Francisco, CA:* Paul Brakeman<sup>\*</sup>, Daniel Schrader  
*University of Colorado Anschutz Medical Campus, Aurora, CO:* James Dylewski<sup>\*</sup>, Nathan Rogers<sup>#</sup>  
*University of Kansas Medical Center, Kansas City, KS:* Ellen McCarthy<sup>\*</sup>, Catherine Creed<sup>#</sup>  
*University of Miami, Miami, FL:* Alessia Fornoni<sup>\*</sup>, Miguel Bandes<sup>#</sup>  
*University of Michigan, Ann Arbor, MI:* Matthias Kretzler<sup>\*</sup>, Laura Mariani<sup>\*</sup>, Zubin Modi<sup>\*</sup>, A Williams<sup>#</sup>, Roxy Ni<sup>#</sup>

*University of Minnesota, Minneapolis, MN:* Patrick Nachman<sup>\*</sup>, Michelle Rheault<sup>\*</sup>, Amy Hanson<sup>#</sup>, Nicolas Rauwolf<sup>#</sup>

*University of North Carolina, Chapel Hill, NC:* Vimal Derebail<sup>\*</sup>, Keisha Gibson<sup>\*</sup>, Anne Froment<sup>#</sup>, Mary Mac McGown Collie<sup>#</sup>

*University of Pennsylvania, Philadelphia, PA:* Lawrence Holzman<sup>\*</sup>, Kevin Meyers<sup>\*\*</sup>, Krishna Kallem<sup>#</sup>, Aliya Edwards<sup>#</sup>

*University of Texas San Antonio, San Antonio, TX:* Samin Sharma<sup>\*\*</sup>

*University of Texas Southwestern, Dallas, TX:* Elizabeth Roehm<sup>\*</sup>, Kamalanathan Sambandam<sup>\*\*</sup>, Elizabeth Brown<sup>\*\*</sup>, Jamie Hellewege

*University of Washington, Seattle, WA:* Ashley Jefferson<sup>\*</sup>, Sangeeta Hingorani<sup>\*\*</sup>, Katherine Tuttle<sup>\*\*§</sup>, Linda Manahan<sup>#</sup>, Emily Pao<sup>#</sup>, Kelli Kuykendall<sup>§</sup>

*Wake Forest University Baptist Health, Winston-Salem, NC:* Jen Jar Lin<sup>\*\*</sup>

*Washington University in St. Louis, St. Louis, MO:* Vikas Dharnidharka<sup>\*</sup>

**Data Analysis and Coordinating Center:** *University of Michigan:* Matthias Kretzler<sup>\*</sup>, Brenda Gillespie<sup>\*\*</sup>, Laura Mariani<sup>\*\*</sup>, Zubin Modi<sup>\*\*</sup>, Eloise Salmon<sup>\*\*</sup>, Howard Trachtman<sup>\*\*</sup>, Tina Mainieri, Gabrielle Alter, Michael Arbit, Hailey Desmond, Sean Eddy, Damian Fermin, Wenjun Ju, Maria Larkina, Chrysta Lienczewski, Rebecca Scherr, Jonathan Troost, Amanda Williams, Yan Zhai; *Arbor Collaborative for Health:* Colleen Kincaid, Shengqian Li, Shannon Li; *Cleveland Clinic:* Crystal Gadegbeku<sup>\*\*</sup>; *Duke University:* Laura Barisoni<sup>\*\*</sup>; John Sedor<sup>\*\*</sup>; *Harvard University:* Matthew G Sampson<sup>\*\*</sup>; *Northwestern University:* Abigail Smith<sup>\*\*</sup>; *University of Pennsylvania:* Lawrence Holzman<sup>\*\*</sup>, Jarcy Zee<sup>\*\*</sup>

**Digital Pathology Committee:** Carmen Avila-Casado (*University Health Network*), Serena Bagnasco (*Johns Hopkins University*), Lihong Bu (*Mayo Clinic*), Shelley Caltharp (*Emory University*), Clarissa Cassol (*Arkana*), Dawit Demeke (*University of Michigan*), Brenda Gillespie (*University of Michigan*), Jared Hassler (*Temple University*), Leal Herlitz (*Cleveland Clinic*), Stephen Hewitt (*National Cancer Institute*), Jeff Hodgins (*University of Michigan*), Danni Holanda (*Arkana*), Neeraja Kambham (*Stanford University*), Kevin Lemley, Laura Mariani (*University of Michigan*), Nidia Messias (*Washington University*), Alexei Mikhailov (*Wake Forest*), Vanessa Moreno (*University of North Carolina*), Behzad Najafian (*University of Washington*), Matthew Palmer (*University of Pennsylvania*), Avi Rosenberg (*Johns Hopkins University*), Virginie Royal (*University of Montreal*), Miroslav Sekulik (*Columbia University*), Barry Stokes (*Columbia University*), David Thomas (*Duke University*), Ming Wu (*University of New York*), Michifumi Yamashita (*Cedar Sinai*), Hong Yin (*Emory University*), Jarcy Zee (*University of Pennsylvania*), Yiqin Zuo (*University of Miami*). Co-Chairs: Laura Barisoni (*Duke University*), Cynthia Nast (*Cedar Sinai*).

#### **For KPMP:**

*American Association of Kidney Patients, Tampa, FL:* Richard Knight

*Beth Israel Deaconess, Boston, MA:* Stewart Lecker, Isaac Stillman

*Brigham & Women's Hospital, Boston, MA:* Gearoid McMahon, Sus Waikar, Astrid Weins

*Broad Institute, Cambridge, MA:* Nir Hacohen, Paul Hoover

*Case Western Reserve, Cleveland, OH:* Mark Aulisio, Will Bush, Dana Crawford

*Cleveland Clinic, Cleveland, OH:* Leslie Cooperman, Leal Herlitz, John O'Toole, Emilio Poggio, John Sedor  
*Columbia University, New York, NY:* Paul Appelbaum, Olivia Balderes, Jonathan Barasch, Andrew Bombback, Vivette D'agati, Krzysztof Kiryluk, Karla Mehl, Ning (Sunny) Shang, Chenhua Weng  
*Duke University, Durham, NC:* Laura Barisoni  
*European Molecular Biology Laboratory, Heidelberg, Germany:* Theodore Alexandrov  
*Indiana University, Indianapolis, IN:* Tarek Ashkar, Daria Barwinska, Pierre Dagher, Kenneth Dunn, Michael Eadon, Michael Ferkowicz, Katherine Kelly, Timothy Sutton, Seth Winfree  
*John Hopkins University, Baltimore, MD:* Steven Menez, Chirag Parikh, Avi Rosenberg, Pam Villalobos  
*Joslin Diabetes Center, Boston, MA:* Sylvia Rosas, Mark Williams  
*Mount Sinai, New York, NY:* Evren Azeloglu, Cijang (John) He, Ravi Iyengar  
*Ohio State University, Columbus, OH:* Samir Parikh  
*Pacific Northwest National Laboratories, Richland, WA:* Chris Anderton, Ljiljana Pasa-Tolic, Dusan Velickovic  
*Parkland Center for Clinical Innovation, Dallas, TX:* George (Holt) Oliver  
*Patient Advocates:* Joseph Ardayfio, Jack Bebiak, Keith Brown, Taneisha Campbell, Catherine Campbell, Lynda Hayashi, Nichole Jefferson, Robert Koewler, Glenda Roberts, John Saul, Anna Shpigel, Edith Christine Stutzke, Lorenda Wright  
*Princeton University, Princeton, NJ:* Rachel Sealton, Olga Troyanskaya  
*Providence Medical Research Center, Spokane, WA:* Katherine Tuttle  
*Stanford University, Palo Alto, CA:* Yury Goltsev  
*University of California San Diego, La Jolla, CA:* Blue Lake, Kun Zhang  
*University of California San Francisco, San Francisco, CA:* Dejan Dobi, Maria Joanes, Zoltan Laszik, Garry Nolan, Andrew Schroeder  
*University of Michigan, Ann Arbor, MI:* Ulysses Balis, Oliver He, Jeffrey Hodgin, Matthias Kretzler, Laura Mariani, Rajasree Menon, Edgar Otto, Jennifer Schaub, Becky Steck  
*University of Pittsburgh, Pittsburgh, PA:* Michele Elder, Daniel Hall, John Kellum, Mary Kruth, Raghav Murugan, Paul Palevsky, Parmjeet Randhawa, Matthew Rosengart, Sunny Sims-Lucas, Mary Stefanick, Stacy Stull, Mitchell Tublin  
*University of Washington, Seattle, WA:* Charles Alpers, Ian De Boer, Malia Fullerton, Jonathan Himmelfarb, Robyn McClelland, Sean Mooney, Stuart Shankland, Kayleen Williams, Kristina Blank, Ashveena Dighe  
*UT Health San Antonio, San Antonio, TX:* Kumar Sharma, Guanshi Zhang  
*UT Southwestern Medical Center, Dallas, TX:* Susan Hedayati, Asra Kermani, Simon Lee, Christopher Lu, Tyler Miller, Orson Moe, Harold Park, Kamalanathan Sambandam, Francisco Sanchez, Jose Torrealba, Toto Robert, Miguel Vazquez, Nancy Wang  
*Washington University in St. Louis, St. Louis, MO:* Joe Gaut, Sanjay Jain, Anitha Vijayan  
*Yale University, New Haven, CT:* Tanima Arora, Randy Luciano, Dennis Moledina, Ugwuowo Ugochukwu, Francis Perry Wilson

## **SUPPLEMENTAL FIGURES**

**Supplemental Figure 1:** Overview of the methodology used in this manuscript.

**Supplemental Figure 2: Module eigengene (ME) heatmap and dendrogram of the African ancestry (AA) network.** Modules (shown on the right) of genes with correlated expression are grouped into metamodules (MM) shown on the left, which are derived from eigengene heatmap correlations and dendrogram structure. Some modules relevant in our downstream analyses are highlighted in yellow. The ME of the “Grey” module, containing one uncorrelated gene (*SRGAP3*) is not shown.

**Supplemental Figure 3: Module trait correlations for: Panel A) all participants (ALL), Panel B) ALL participants after adjusting by eGFR and UPCR (ALL\_eGFR-UPCR-Adj).** Each row corresponds to module eigengene and the rows are the traits. The values in the cells are Pearson correlation coefficient ( $r$ ) and in parenthesis the nominal  $p$ -value, as well as the designation “sig.” if  $p \leq 0.012$ , the Bonferroni significant threshold or “n.s.” for  $p > 0.012$ . The cells are color coded for the magnitude of  $r$  using the scale on the right (1, 0, -1; red, white, blue).

**Supplemental Figure 4: Unadjusted Kaplan-Meier curves stratified by tertiles of module Midnightblue (226 genes) gene activation scores in NEPTUNE AA and noAA participants.** Outcomes were time since kidney biopsy to a “Composite Event” of kidney failure or loss of 40% of eGFR, or to “Complete Remission”. Enrichr was used to obtain gene set enrichment analysis using the MSigDB Hallmark 2020 gene set (right panel and table).

**Supplemental Figure 5: Principal Coordinate Analysis using the Euclidean distance matrices of the genes complementary to ChDir.** PERMANOVA failed to separate NEPTUNE participants by *APOL1* risk allele number within this gene space (13,151 genes).

**Supplemental Figure 6: PERMANOVA of NEPTUNE participants using the cell identity signatures for mesangial cells (MC) and glomerular endothelial cells (EC.GC gene).** PERMANOVA and Principal Coordinates Analysis using the Euclidean distance matrices of cell-identity signatures for the glomerular mesangium (MC) and the glomerular capillary endothelium (EC-GC) show lack of separation between NEPTUNE participants with different *APOL1* genotypes.

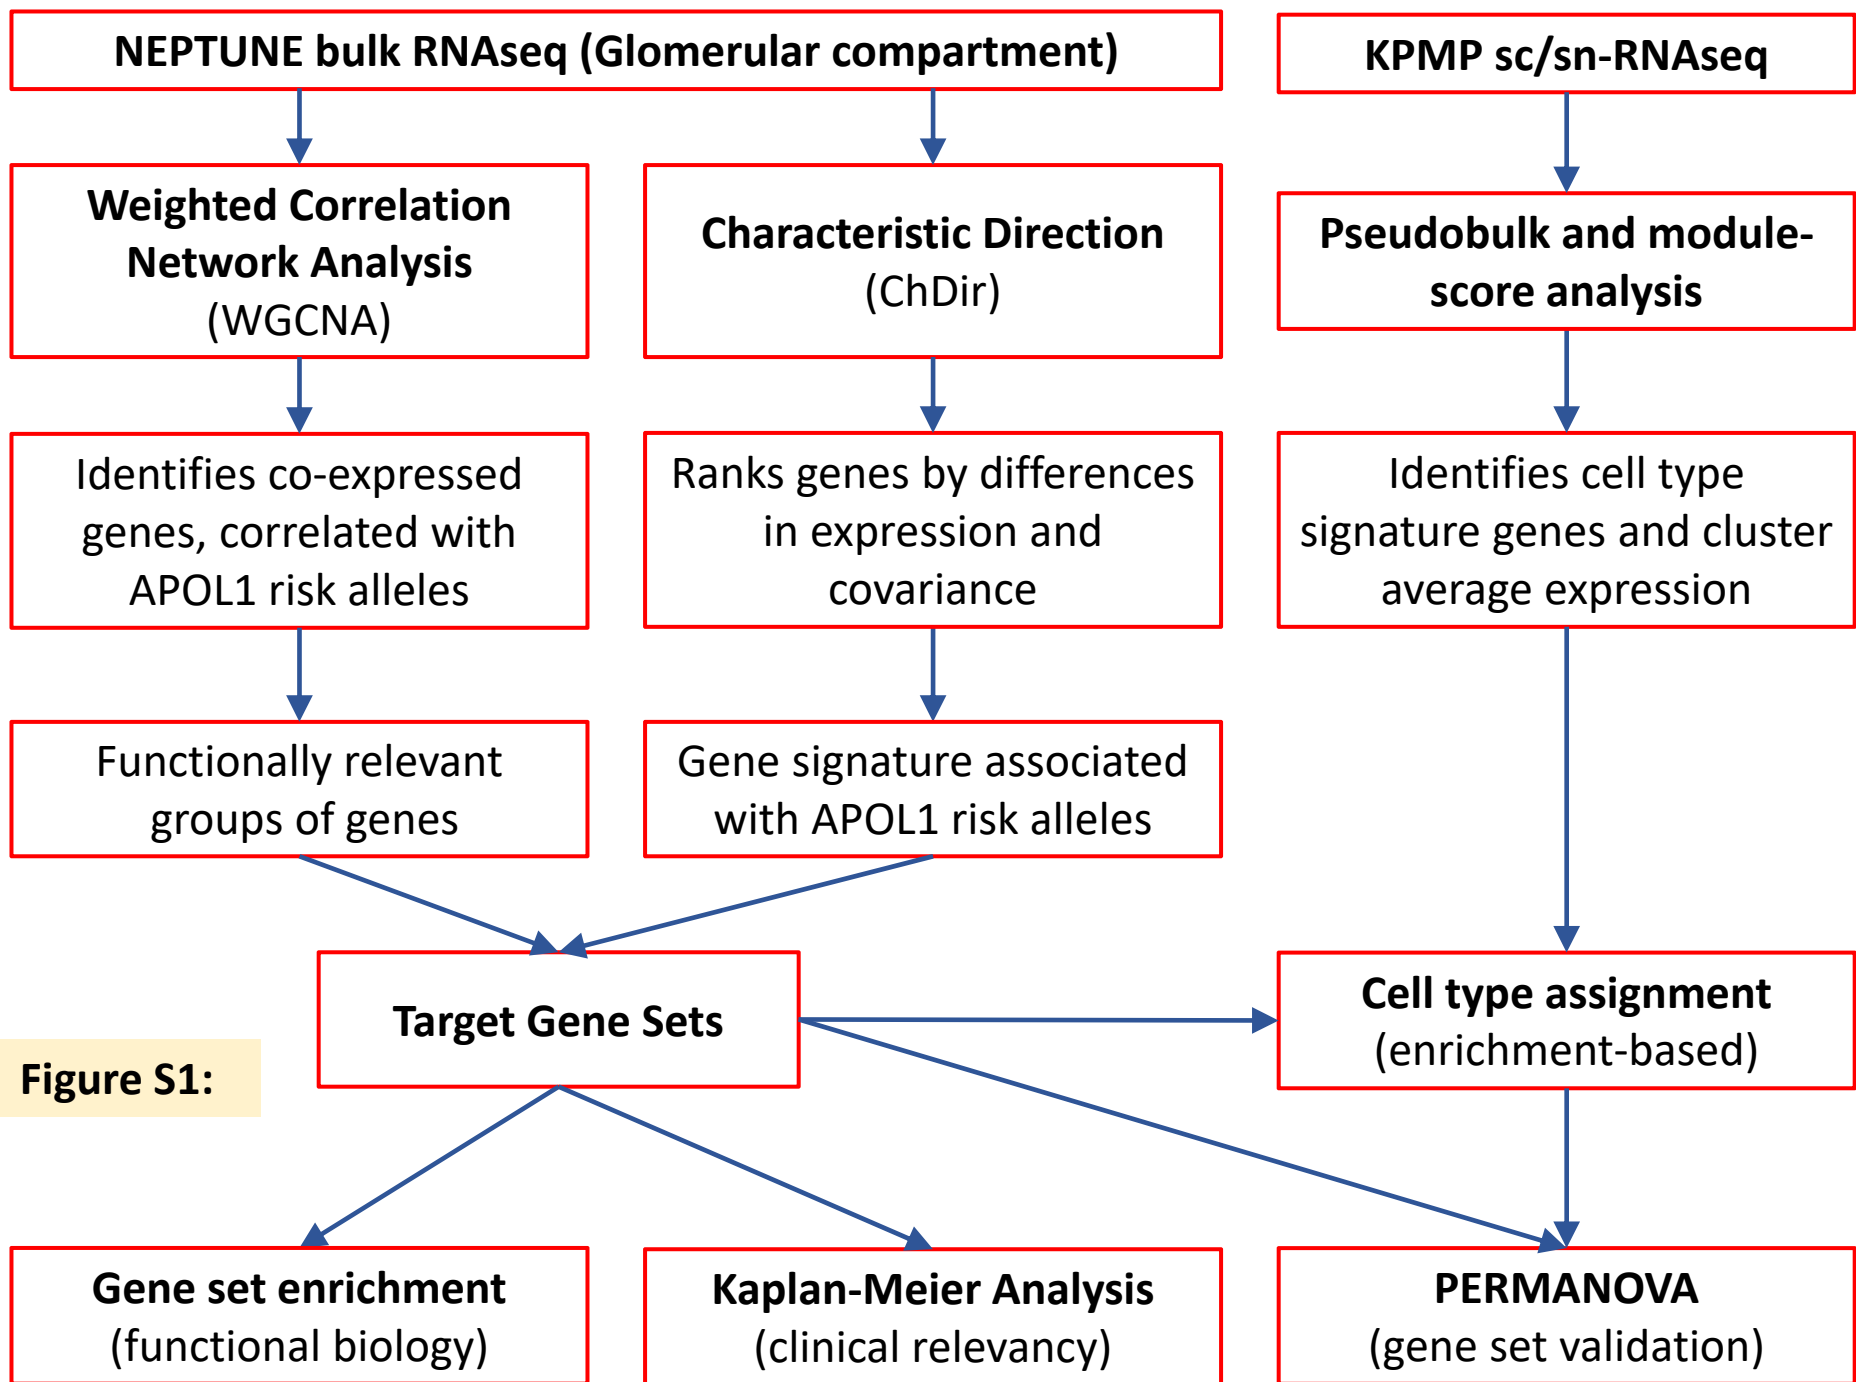

**Figure S1:**

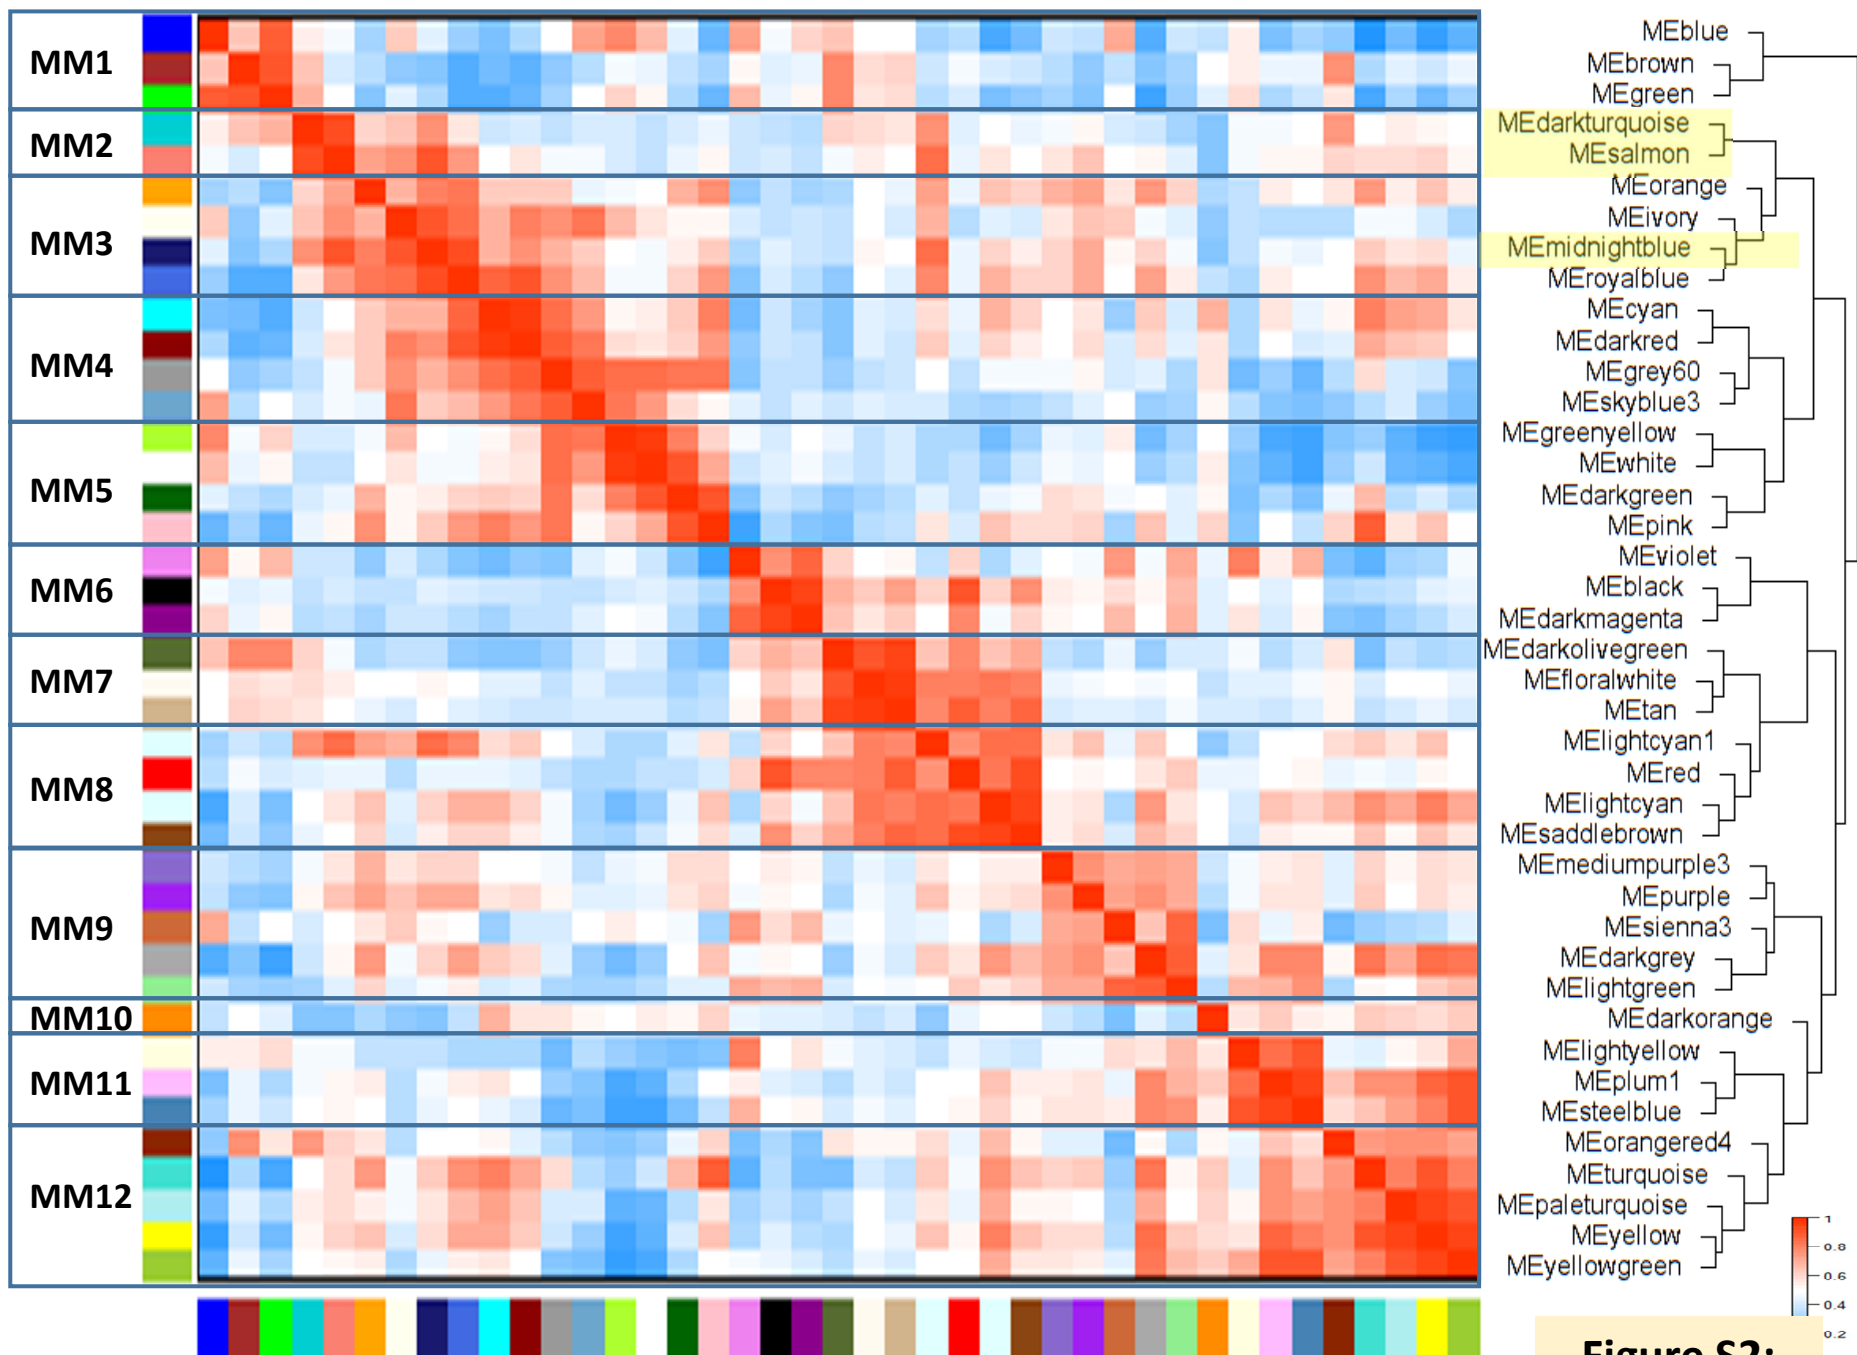

**Figure S2:**



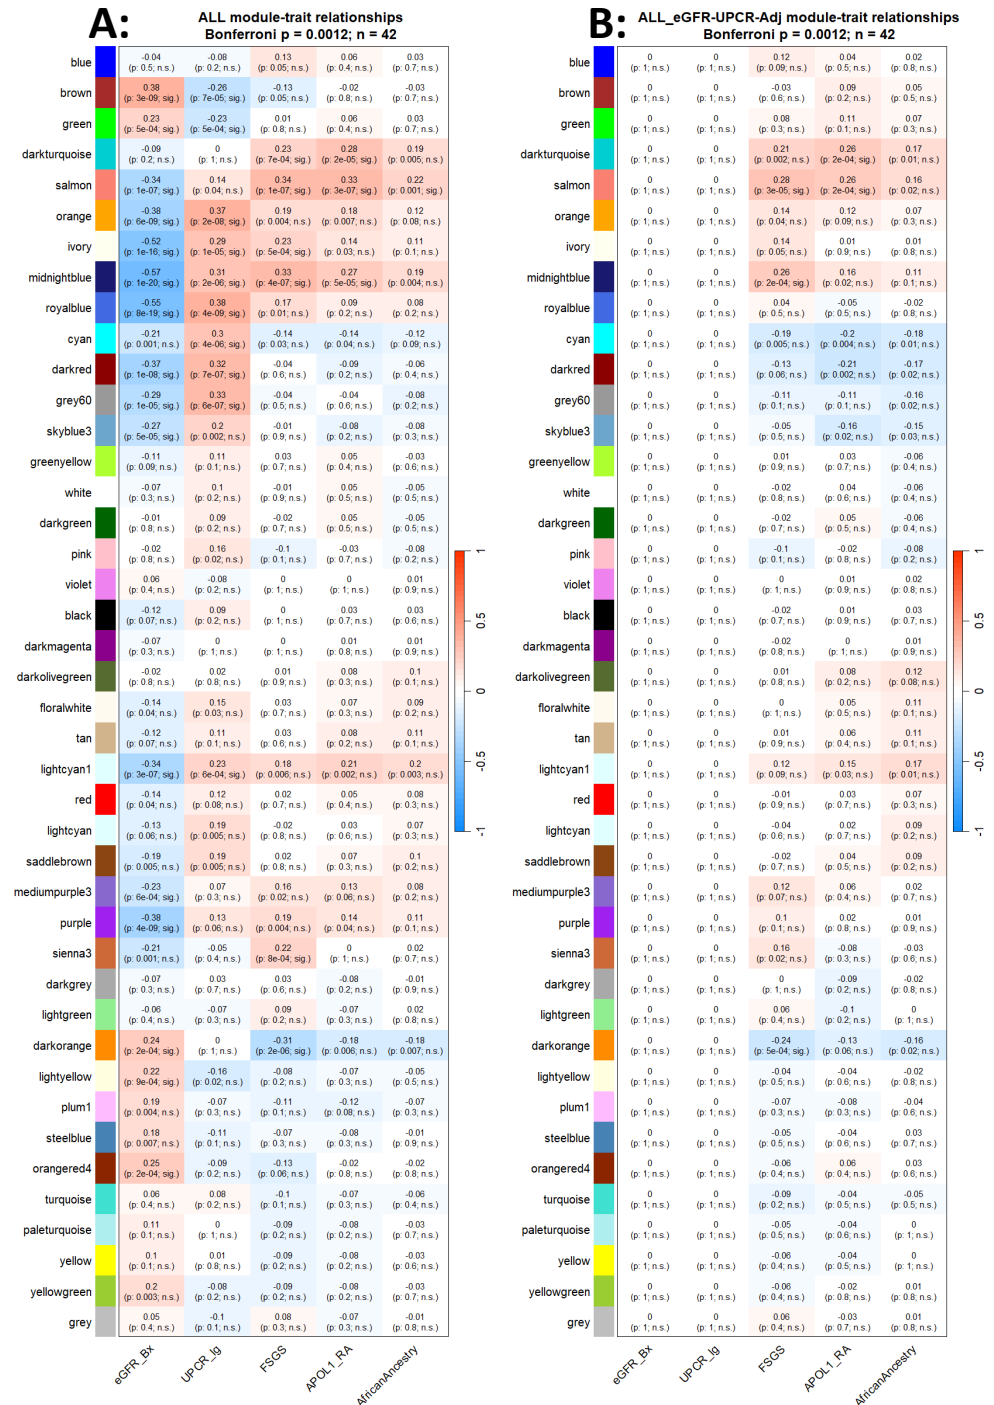

Figure S3:

# AA\_midnightblue (226genes)

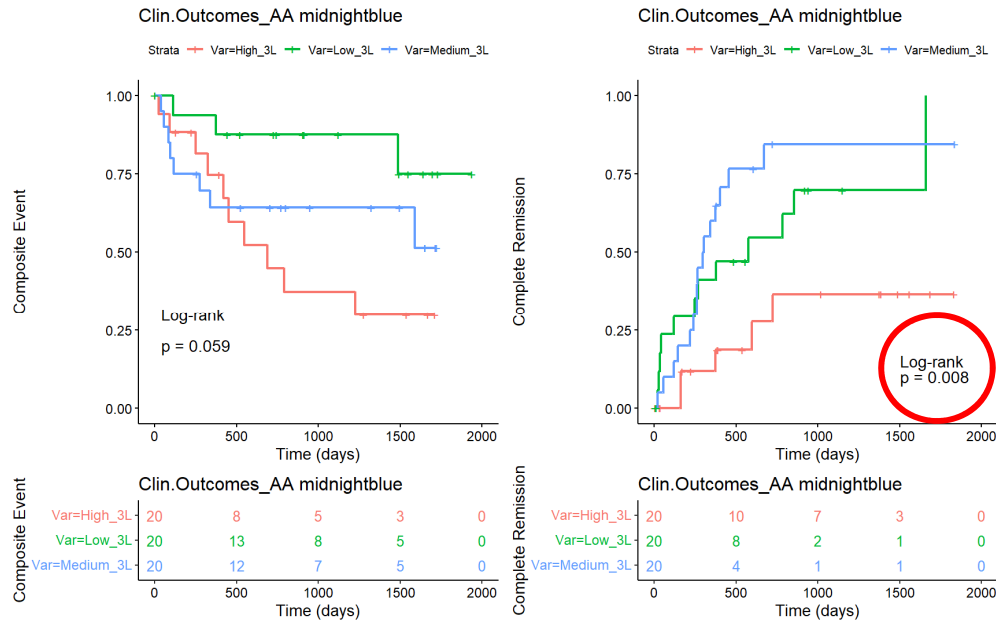

# noAA\_midnightblue (226genes)

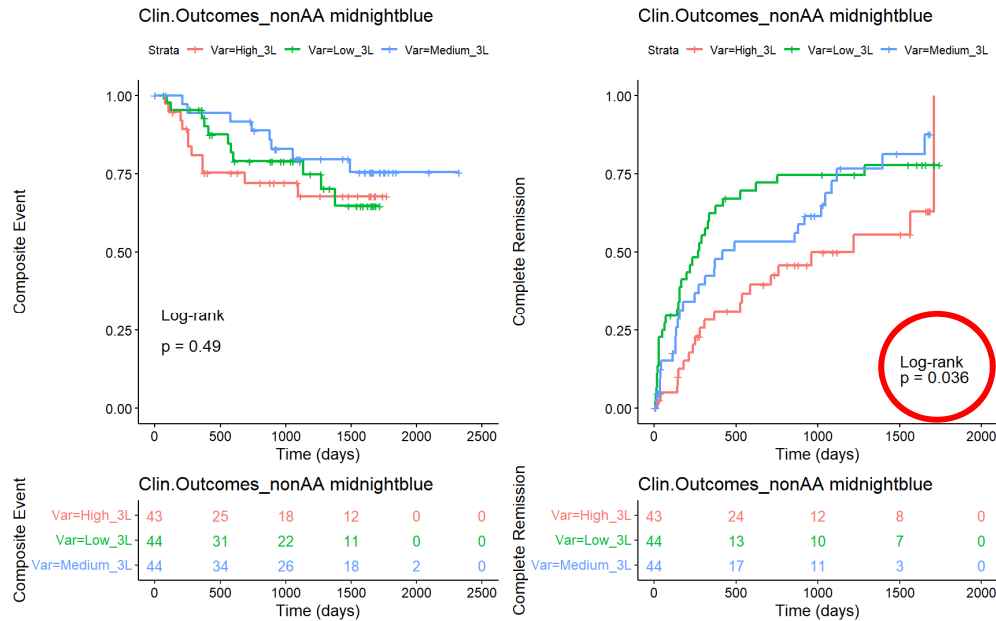

# EnrichR MSigDB Hallmark (226genes)

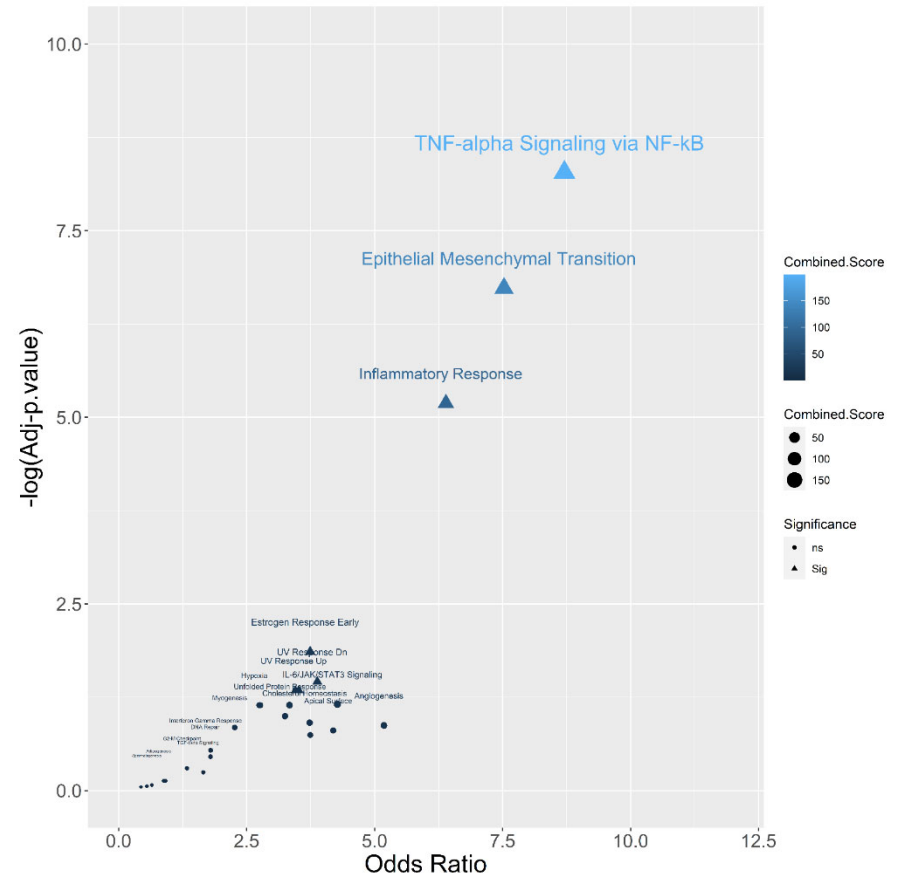

| MSigDB_Hallmark_2020 Term         | Overlap | p-non. | p-adj. | Odds Ratio | Combined Score |
|-----------------------------------|---------|--------|--------|------------|----------------|
| TNF-alpha Signaling via NF-kB     | 17/200  | 1E-10  | <0.001 | 8.71       | 198            |
| Epithelial Mesenchymal Transition | 15/200  | 9E-09  | <0.001 | 7.53       | 139            |
| Inflammatory Response             | 13/200  | 5E-07  | <0.001 | 6.39       | 93             |
| Allograft Rejection               | 8/200   | 2E-03  | <0.05  | 3.74       | 23             |
| Estrogen Response Early           | 8/200   | 2E-03  | <0.05  | 3.74       | 23             |
| Estrogen Response Late            | 8/200   | 2E-03  | <0.05  | 3.74       | 23             |
| UV Response Dn                    | 6/144   | 6E-03  | <0.05  | 3.88       | 20             |
| UV Response Up                    | 6/158   | 9E-03  | <0.05  | 3.52       | 16             |
| Apoptosis                         | 6/161   | 1E-02  | <0.05  | 3.45       | 16             |
| IL-6/JAK/STAT3 Signaling          | 4/87    | 2E-02  | ns     | 4.27       | 17             |

Figure S4:

Figure S5:

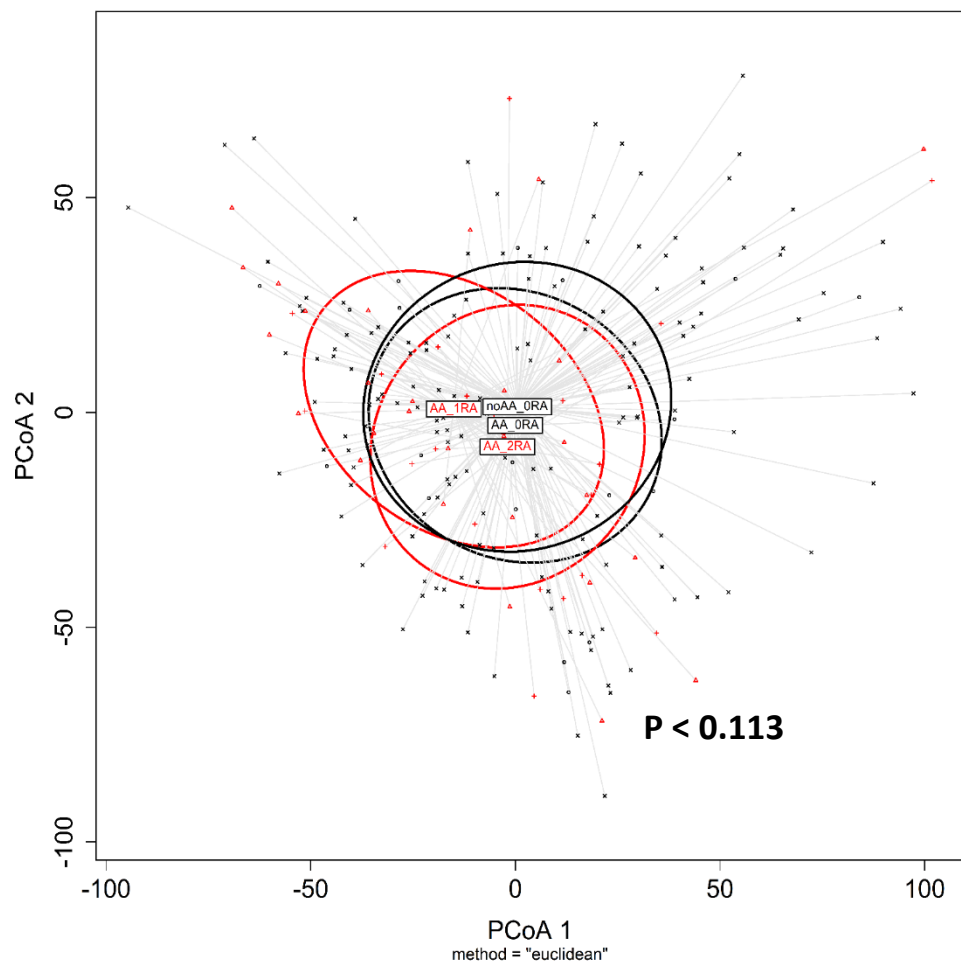

PERMANOVA does not differentiate the centroids of different APOL1 genotypes on the gene space complementary to the ChDir Top75% signature. The lower 25% tail has 13151 genes.

```
Permutation test for adonis under reduced model
Terms added sequentially (first to last)
Permutation: free
Number of permutations: 999

adonis2(formula = dataDist ~ APOL1_Anc, data = dataPCA, permutations = 999, method = "euclidean")
  Df SumOfSqs  R2    F Pr(>F)
APOL1_Anc  3   38272 0.01618 1.2057 0.113
Residual 220 2327741 0.98382
Total    223 2366013 1.00000
```

**Figure S6:**

adonis2(formula = dataDist ~ APOL1\_Anc, data = dataPCA, permutations = 999, method = "euclidean")

| MC : 1131 genes |    |      |       |       |
|-----------------|----|------|-------|-------|
| PERMANOVA       | DF | R2   | F     | p     |
| APOL1_Anc       | 3  | 1.7% | 1.292 | 0.094 |

| MC : 1131 genes    |    |      |      |      |
|--------------------|----|------|------|------|
| Pairs              | DF | R2   | pNom | pAdj |
| AA_2RA vs AA_ORA   | 1  | 3.0% | 0.19 | 1.00 |
| AA_2RA vs noAA_ORA | 1  | 1.0% | 0.05 | 0.27 |
| AA_1RA vs AA_ORA   | 1  | 1.6% | 0.75 | 1.00 |
| AA_1RA vs noAA_ORA | 1  | 0.9% | 0.07 | 0.41 |
| AA_1RA vs AA_2RA   | 1  | 1.8% | 0.50 | 1.00 |
| AA_ORA vs noAA_ORA | 1  | 0.5% | 0.60 | 1.00 |

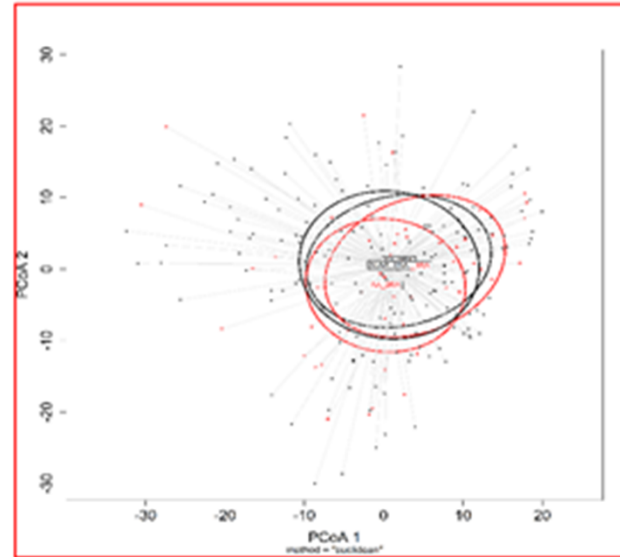

adonis2(formula = dataDist ~ APOL1\_Anc, data = dataPCA, permutations = 999, method = "euclidean")

| EC.GC: 1298 genes |    |      |       |      |
|-------------------|----|------|-------|------|
| PERMANOVA         | DF | R2   | F     | p    |
| APOL1_Anc         | 3  | 1.5% | 1.087 | 0.32 |

| EC.GC: 1298 genes  |    |      |      |      |
|--------------------|----|------|------|------|
| Pairs              | DF | R2   | pNom | pAdj |
| AA_2RA vs AA_ORA   | 1  | 3.0% | 0.21 | 1.00 |
| AA_2RA vs noAA_ORA | 1  | 0.9% | 0.13 | 0.80 |
| AA_1RA vs AA_ORA   | 1  | 1.2% | 0.91 | 1.00 |
| AA_1RA vs noAA_ORA | 1  | 0.6% | 0.26 | 1.00 |
| AA_1RA vs AA_2RA   | 1  | 1.9% | 0.46 | 1.00 |
| AA_ORA vs noAA_ORA | 1  | 0.4% | 0.68 | 1.00 |

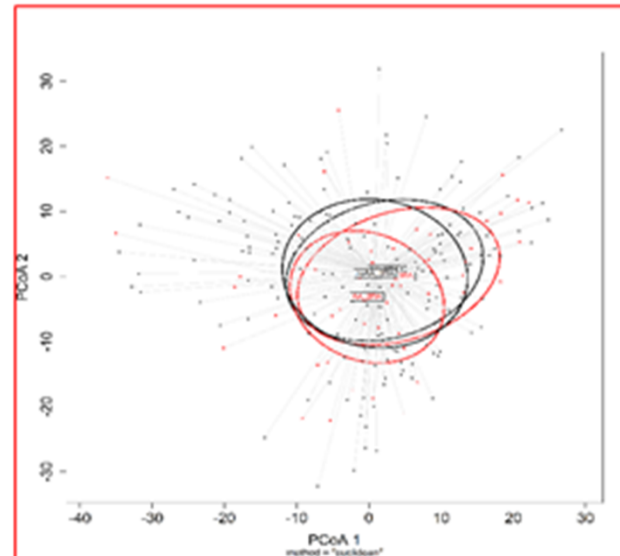

## **SUPPLEMENTAL TABLES**

**Table S1:** *APOL1* alleles in AA stratified by kidney biopsy histopathology.

**Table S2:** WGCNA Network modules and metamodules gene assignments (Provided as \*.csv file)

**Table S3:** Characteristic direction gene signature and ranks for AA\_2RA vs AA\_ORA (Provided as \*.xlsx file)

**Table S4:** Kidney Precision Medicine Project single-cell and single-nuclei RNAseq data integration (Provided as \*.xlsx file)

**Table S5:** Number of genes in the Cell-Identity and Cell-Exclusive gene signatures



**Table S1:**

| <b>Diagnosis<br/>(Cohort)</b> | <b>APOL1 risk alleles</b> |            |            | <b>Total<br/>(#)</b> |
|-------------------------------|---------------------------|------------|------------|----------------------|
|                               | <b>2RA</b>                | <b>1RA</b> | <b>0RA</b> |                      |
| <b>FSGS</b>                   | 17                        | 14         | 4          | 35                   |
| <b>MCD</b>                    | 4                         | 9          | 11         | 24                   |
| <b>MN</b>                     | 1                         | 7          | 5          | 13                   |
| <b>Total (#)</b>              | 22                        | 30         | 20         | 72                   |
| <b>Total (%)</b>              | 30.6%                     | 41.7%      | 27.8%      |                      |

**Table S5:**

| Anatomy as defined by the KPMP |                                  |              | Cell-identity<br>gene signature | Cell-exclusive<br>gene signature |
|--------------------------------|----------------------------------|--------------|---------------------------------|----------------------------------|
| Region                         | subRegion                        | subRegion.ID | (#)                             | (#)                              |
| Glomerulus / Renal Corpuscle   | Glomerular Visceral Epithelium   | POD          | 1814                            | 125                              |
| Glomerulus / Renal Corpuscle   | Glomerular Parietal Epithelium   | PEC          | 1220                            | 26                               |
| Glomerulus / Renal Corpuscle   | Glomerular Mesangium             | MC           | 1131                            | 15                               |
| Glomerulus / Renal Corpuscle   | Glomerular Capillary Endothelium | ECGC         | 1298                            | 9                                |
| Tubules                        | Proximal Tubule                  | PT           | -                               | 425                              |
| Tubules                        | Loop of Henle (Thin Limb)        | Thin.Limbs   | -                               | 201                              |
| Tubules                        | Loop of Henle (Thick Limb)       | TAL          | -                               | 80                               |
| Tubules                        | Distal Convolution               | DCT          | -                               | 131                              |
| Tubules                        | Connecting Tubule                | CNT          | -                               | 88                               |
| Tubules                        | Collecting Duct                  | CD           | -                               | 132                              |
| Vessels                        | Endothelium (Non-glomerular)     | EC           | -                               | 165                              |
| Interstitialium                | Stroma (Non-glomerular)          | SC           | -                               | 365                              |
| Interstitialium                | Immune                           | IMN          | -                               | 950                              |

## **EXTENDED METHODS**

### **NEPTUNE Study Cohort:**

The Nephrotic Syndrome Study Network (NEPTUNE) is a longitudinal study of patients with primary nephrotic syndrome [1]. Participants in the NEPTUNE Biopsy Cohort provide a biopsy core at enrollment, as well as blood, urine, and clinical data at enrollment and at 4 to 6 month intervals. The NEPTUNE Data Coordination Center controls access to the data and provided RNAseq glomerular batch-corrected count matrices from 224 individuals with associated clinical data, including *APOL1* genotypes and clinical outcomes. Data is available from NEPTUNE upon request.

A variable called inferred African ancestry (AA) was defined positive for those patients having an *APOL1* genotype different from G0/G0, and/or a self-reported race of "Black/African American" (n=72); while G0/G0 individuals, who did not self-identify as "Black/African American," were defined as not having African ancestry (noAA, n=152). Self-reported race and presence of *APOL1* risk alleles highly correlated with African genetic ancestry in NEPTUNE participants [2, 3].

### **NEPTUNE glomerular RNAseq data:**

Glomerular transcriptomes from microdissected glomeruli were obtained from the NEPTUNE consortium with their associated clinical data. All available glomerular transcriptomes (n=224) from the NEPTUNE study cohort were quality controlled and normalized as a group yielding 14632 protein-coding genes. A geneINFO data frame was obtained using the R package Annotables and the grch38 genome information. The R package DESeq2 was used for quality control and normalization of count tables. Genes with 0 (zero) variance were eliminated and a DESeq2 object was created. Sequencing depth was normalized using the function *estimateSizeFactors()*, and size factors were saved to the Clinical/metadata data frame. Principal Component Analysis (PCA) was conducted using R packages FactoMineR and factoextra for quality control. Two sample outliers were identified and excluded from the remaining analyses, after which the raw data was renormalized and re-inspected. Protein-coding genes with valid NCBI IDs were selected from the normalized count matrix, which yielded 14632 genes. One count was added to all values on the matrix and then a Log<sub>2</sub> transformation was applied. Data was re-inspected using boxplots and PCA. The Normalized/Filtered/Log<sub>2</sub>-transformed matrix, and the relational Clinical Data and geneINFO data frames were saved into an R object for downstream analyses. In some analyses, the Normalized/Filtered/Log<sub>2</sub>-transformed matrix was adjusted for estimated glomerular filtration rate (eGFR) and urinary protein creatinine ratio (UPCR) (~ eGFR + UPCR), by fitting a linear model in the R package Limma [4] and extracting the residuals matrix.

### ***APOL1* transgenic mouse glomerular microarray data:**

We generated glomerular transcriptomes from 40-day old Tg26 transgenic mice with *APOL1*-G0 or *APOL1*-G2 transgenes controlled by the murine *Nphs1* promoter [5, 6]. Glomeruli were isolated by successive sieving as previously described [7]. Total RNA was extracted from the glomeruli using methods similar than before [8-10]. In brief, total RNA was extracted using RNeasy mini kit (QIAGEN) according to manufacturer's recommendations, quantitated using a NanoDrop 2000 spectrophotometer (Thermo Scientific), and adjusted to a final concentration of 50 ng/μl with nuclease free water (Qiagen). The concentration-adjusted RNA was submitted to the Genomics Core at CWRU School of Medicine. RNA expression data were generated using the Mouse Gene 2.0 ST Array (Affymetrix). Individual cluster transcript IDs were mapped to the mouse genome, summarized and annotated using 23748 mouse

EntrezIDs. Batch correction was performed using ComBat [11]. Genes that were not expressed above background in at least 50% of the samples were removed, yielding a total of 19170 annotated genes. The R package Limma [4] was used to fit a linear model for sex ( $\sim$ sex), and the residuals matrix was extracted for analysis.

### **Weighted Gene Co-Expression Network Analysis (WGCNA) in individuals with AA:**

The 72 individuals with AA were selected to build a gene coexpression network. PCA did not identify any trait in the clinical data set that clustered the genomewide transcriptomes. A gene coexpression network was constructed using WGCNA methodology, as implemented in the R package WGCNA [12, 13]. WGCNA consists of two main steps. In the first step, a coexpression network is constructed from gene expression data. For this, a Pearson-correlation coefficient is calculated for each gene pair using the gene expression pair values from each sample as individual points. The correlation coefficient of all samples is then stored in a symmetric matrix (#genes, #genes). The correlation matrix is transformed into an adjacency matrix by applying the adjacency function, and then into the topological overlap matrix (TOM) by counting the n-step connections shared by any pair of genes [14]. We used the “signed” version of the adjacency function and selected the soft thresholding power accordingly to the scale-free topology criterion [14]. Finally, genes with shared connectivity were clustered into coexpression modules. WGCNA summarizes the expression profiles of the genes within each coexpression module (in-module genes) into one vector called a module eigengene, which weights the expression of all genes within a module for each sample. The second step in WGCNA calculates if the module eigengene correlates with a trait of interest by using the eigengene/trait pairs for each sample. For instance, to explore the significance of a module with FSGS, a discrete variable corresponding to a histopathological classification was created. Patients were coded as “1” if they were diagnosed with FSGS or as “0” if they were diagnosed with either MCD or MN. Then the module significance was calculated as the Pearson correlation coefficient between the eigengene of each sample and FSGS [13, 15]. The significance threshold was adjusted by the number of coexpression modules using the Bonferroni method. This procedure can also be implemented with continuous variables such as eGFR.

### **Correlation of transcriptomics analyses with clinical outcomes:**

NEPTUNE participants are followed prospectively for up to five years, providing longitudinal data for the following clinical outcomes: 1) “Complete Remission”, defined as  $UPCR \leq 0.3$  at any visit after screening among patients with active disease at screening; and 2) “Composite Event” defined as a patient reaching ESKD (two consecutive  $eGFR < 15$ , dialysis or transplantation) or an  $eGFR < 90$  and a decline  $\geq 40\%$  from baseline. We conducted Kaplan-Meier analysis using gene expression z-scores tertiles as surrogates for the gene activation signatures of interest at the time of kidney biopsy as previously reported [16, 17]. In brief, gene expression levels were z-transformed; then, an average z-score for each gene signature was calculated for the 191 NEPTUNE participants (60 AA and 161 noAA) with sufficient longitudinal data to assess outcomes. Finally, patients were stratified by gene activation tertiles [high, medium, low]. Differences between the curves were tested using the log-rank test. We conducted Kaplan-Meier analysis using the following gene spaces: 1) MM2 (437 genes), 2) Midnightblue module (226 genes) and 3) the *APOL1* ChDir signature (1481 genes). Independent analyses were conducted on AA and nonAA NEPTUNE participants.

### **Functional enrichment analyses:**

We utilized EnrichR [18, 19] to conduct functional enrichment analysis using the Molecular Signatures Database (MSigDB) Hallmark gene sets [20]. The Hallmark gene sets "summarize and represent specific well-defined biological states or processes and display coherent expression. These gene sets were generated by a computational methodology based on identifying overlaps between gene sets in other MSigDB collections and retaining genes that display coordinate expression" [21].

### **Characteristic Direction (ChDir):**

ChDir [22] is a geometric multivariate approach to differential gene expression and was previously used by us and other investigators to obtain transcriptional signatures from proximal tubules [10, 23], podocytes [24], and human kidney cancerous cells [25]. This method generates a hyperplane that separates two classes in an  $n_{(\text{gene})}$ -dimensional space. The hyperplane orientation, defined by a normal vector, describes overall differences in gene expression between two conditions. Variance shrinkage gives more weight to coexpressed genes than to those with large expression differences between classes. Expression differences are normalized, so that the sum of the squares of all genes adds up to 1 and then ranked in descending order. These normalized gene vectors represent the fractional contribution of each gene to the overall transcriptional differences between classes, which allows the extraction of the top-scoring classifier genes accounting for 75% of discrimination between classes. In our analyses, these genes represent a signature that differentiates individual by number of *APOL1* kidney risk alleles.

### **Single-cell (sc) and single-nucleus (sn) RNAseq matrices:**

We previously used the Kidney Precision Medicine Project (KPMP) scRNAseq and snRNAseq data [26-28] to obtain quantitative full transcriptomes [29] as well as gene enrichment [9] of kidney cells. In these approaches, some genes are enriched in several cell types and can reduce the accuracy of cell identity signatures. To mitigate this problem, we used a stringent method to obtain cell identity signatures enriched in specific glomerular cells, as well as cell identity signatures unique to specific kidney cell types.

We downloaded single cell (scRNAseq) and single nuclear (snRNAseq) RNA sequencing data from the Kidney Tissue Atlas (<https://atlas.kpmp.org/explorer/>) during September and October 2021. The scRNAseq expression dataset included 12 AKI and 15 CKD participants, and the snRNAseq expression dataset included 3 healthy reference tissue, 6 AKI and 10 CKD participants. Together, both technologies detected 85 non-redundant clusters from 13 anatomical sub-regions defined by the KPMP as: 1) Glomerular Visceral Epithelium (POD), 2) Glomerular Parietal Epithelium (PEC), 3) Glomerular Mesangium (MC), 4) Glomerular Capillary Endothelium (ECGC), 5) Proximal Tubule (PT), 6) Loop of Henle thin portion (Thin Limbs), 7) Loop of Henle thick portion (TAL), 8) Distal Convolution (DCT), 9) Connecting Tubule (CNT), 10) Collecting Duct (CD), 11) Endothelium Non-Glomerular (EC), 12) Stroma Non-Glomerular (SC), and 13) Immune (IMN) (**Supplemental Table 3; Tab: Metadata**).

The data integration workflow can be found in **Supplemental Table 3; Tab: Data Integration** and Followed multiple steps: Step 1) a matrix with dimensions ( $i \times j$ ), corresponding to genes ( $i$ ) and cell-clusters ( $j$ ) was created for each technology, i.e. scRNAseq and snRNAseq. Each of these matrices contained either a positive  $\log_2$  fold-change (FC) value for the genes expressed in each cluster compared to the average of all other clusters, which are defined as non-enriched genes (NS); Step 2) both matrices were expanded to match the gene and cluster dimensions by imputing 'NA' in all new fields. Then, matrices were transformed to binary expression matrices by assigning a value of '1' for any value larger than zero ( $>0$ ) and a value of '0' for "NS" and "NA" cells; Step 3) A "Binary Sum" matrix was created by the element wise addition of



both binary matrices. The possible values of the binary sum matrix were '0', '1' or '2', indicating that the expression of element 'i' (gene) was found above average in the 'j' (cell-cluster) by 'none', 'one' or 'two' sequencing technologies, respectively. **Step 4**) a subRegion expression signature matrix was created by grouping the expression of individual cell clusters by anatomical sub-regions as defined above. As an example, the sub-region Glomerular Visceral Epithelium (POD) integrates the data from both technologies, and contains all genes with a positive fold change in either podocytes or degenerative podocytes. Finally, the 14617 genes that mapped to the NEPTUNE network genes (14632 genes) were annotated and selected for downstream analysis (**Supplemental Table 3; Tab: subRegion expression matrix**). The total number of genes on each of the cell identity and cell exclusive gene signatures can be found in **Supplemental Table 3; Tab: Cell Signatures**.

#### **Permutational Multivariate Analysis of Variance (PERMANOVA) and Principal Coordinates Analysis (PCoA):**

We used PERMANOVA [30, 31] to determine the statistical significance of differences between two or more groups of transcriptomes based on gene expression data. PERMANOVA evaluates group separations by calculating a pseudo-F statistic, comparing the variability within groups to the variability between groups, based on a specified distance matrix. The method provides an  $R^2$  statistic, representing the percentage of variability explained by group differences, and a p-value, indicating the statistical significance of the separation. To implement this method, we applied the function *adonis2()* from the R package 'vegan' [32]. We inputted the Euclidian distance matrix as it emphasizes the actual proximity of gene expression values [33] as opposed to WGCNA and ChDir, which are leveraged towards covariance analysis. This approach allowed us to look at different aspects of the transcriptional landscape. In cases where more than two groups were compared, we performed post-hoc pairwise comparisons using the *pairwise.adonis()* function with default parameters [81] to adjust the p-values. Other investigators used PERMANOVA for transcriptome analysis before [36, 37], including in kidney transcriptomics [34, 35]. To visualize the separation of groups, we performed Principal Coordinates Analysis (PCoA) using the Euclidean distance matrix. PCoA reduces the dimensionality of the data, allowing us to represent the relationships between transcriptomes graphically while preserving as much distance information as possible. The first two principal coordinates were used to generate the ordination plots shown in the figures.

**Module Scores:** gene module expression scores in kidney cells were calculated as previously reported [8]. In brief, the "Integrated Single-nucleus and Single-cell RNA-seq of the Adult Human Kidney" (GSE169285) dataset was downloaded on December 8<sup>th</sup> 2023, from <https://cellxgene.cziscience.com/collections/bcb61471-2a44-4d00-a0af-ff085512674c>. The downloaded file name was "baa97c56-c7a0-4858-bdcd-3fb5802177ed.rds", which contains transcriptomes from 304,652 cells from the kidney cortex, medulla, and papilla. Analyses were conducted using the R package Seurat (version 5.1.0). Glomerular cells were extracted based on the subclass.l2 annotation, yielding 3,764 EC-GC, 458 MC, 2,420 POD, 412 degenerative POD (dPOD), and 2,417 PEC. Genes associated with MM2, MM4, and MM10 were mapped onto glomerular cell clusters, and module scores were calculated using the *AddModuleScore()* function and visualized using *VlnPlot()*.

## SUPPLEMENTAL REFERENCES

1. Gadegbeku, C.A., et al., *Design of the Nephrotic Syndrome Study Network (NEPTUNE) to evaluate primary glomerular nephropathy by a multidisciplinary approach*. *Kidney Int*, 2013. **83**(4): p. 749-56.
2. Sampson, M.G., et al., *Integrative Genomics Identifies Novel Associations with APOLI Risk Genotypes in Black NEPTUNE Subjects*. *J Am Soc Nephrol*, 2016. **27**(3): p. 814-23.
3. McNulty, M.T., et al., *A glomerular transcriptomic landscape of apolipoprotein L1 in Black patients with focal segmental glomerulosclerosis*. *Kidney Int*, 2022. **102**(1): p. 136-148.
4. Ritchie, M.E., et al., *limma powers differential expression analyses for RNA-sequencing and microarray studies*. *Nucleic Acids Res*, 2015. **43**(7): p. e47.
5. Bruggeman, L.A., et al., *APOLI-G0 protects podocytes in a mouse model of HIV-associated nephropathy*. *PLoS One*, 2019. **14**(10): p. e0224408.
6. Bruggeman, L.A., et al., *APOLI-G0 or APOLI-G2 Transgenic Models Develop Preeclampsia but Not Kidney Disease*. *J Am Soc Nephrol*, 2016. **27**(12): p. 3600-3610.
7. Schlondorff, D., *Preparation and study of isolated glomeruli*. *Methods Enzymol*, 1990. **191**: p. 130-40.
8. Zhang, R., et al., *Abnormal activation of the mineralocorticoid receptor in the aldosterone-sensitive distal nephron contributes to fructose-induced salt-sensitive hypertension*. *bioRxiv*, 2024: p. 2024.08.19.608663.
9. Forester, B.R., et al., *Knocking Out Sodium Glucose-Linked Transporter 5 Prevents Fructose-Induced Renal Oxidative Stress and Salt-Sensitive Hypertension*. *Hypertension*, 2024. **81**(6): p. 1296-1307.
10. Gonzalez-Vicente, A., J.L. Garvin, and U. Hopfer, *Transcriptome signature for dietary fructose-specific changes in rat renal cortex: A quantitative approach to physiological relevance*. *PLoS One*, 2018. **13**(8): p. e0201293.
11. Leek, J.T., et al., *The sva package for removing batch effects and other unwanted variation in high-throughput experiments*. *Bioinformatics*, 2012. **28**(6): p. 882-3.
12. Langfelder, P. and S. Horvath, *Fast R Functions for Robust Correlations and Hierarchical Clustering*. *J Stat Softw*, 2012. **46**(11).
13. Langfelder, P. and S. Horvath, *WGCNA: an R package for weighted correlation network analysis*. *BMC Bioinformatics*, 2008. **9**: p. 559.
14. Zhang, B. and S. Horvath, *A general framework for weighted gene co-expression network analysis*. *Stat Appl Genet Mol Biol*, 2005. **4**: p. Article17.
15. Ghazalpour, A., et al., *Integrating genetic and network analysis to characterize genes related to mouse weight*. *PLoS Genet*, 2006. **2**(8): p. e130.
16. Tao, J., et al., *JAK-STAT signaling is activated in the kidney and peripheral blood cells of patients with focal segmental glomerulosclerosis*. *Kidney Int*, 2018. **94**(4): p. 795-808.
17. Menon, R., et al., *Single cell transcriptomics identifies focal segmental glomerulosclerosis remission endothelial biomarker*. *JCI Insight*, 2020. **5**(6).
18. Kuleshov, M.V., et al., *Enrichr: a comprehensive gene set enrichment analysis web server 2016 update*. *Nucleic Acids Res*, 2016. **44**(W1): p. W90-7.
19. Chen, E.Y., et al., *Enrichr: interactive and collaborative HTML5 gene list enrichment analysis tool*. *BMC Bioinformatics*, 2013. **14**: p. 128.

20. Liberzon, A., et al., *The Molecular Signatures Database (MSigDB) hallmark gene set collection*. Cell Syst, 2015. **1**(6): p. 417-425.
21. *MSigDB Collections: Details and Acknowledgments*. Available from: [http://www.gsea-msigdb.org/gsea/msigdb/collection\\_details.jsp#H](http://www.gsea-msigdb.org/gsea/msigdb/collection_details.jsp#H).
22. Clark, N.R., et al., *The characteristic direction: a geometrical approach to identify differentially expressed genes*. BMC Bioinformatics, 2014. **15**: p. 79.
23. Piret, S.E., et al., *Loss of proximal tubular transcription factor Kruppel-like factor 15 exacerbates kidney injury through loss of fatty acid oxidation*. Kidney Int, 2021. **100**(6): p. 1250-1267.
24. Guo, Y., et al., *Podocyte-Specific Induction of Kruppel-Like Factor 15 Restores Differentiation Markers and Attenuates Kidney Injury in Proteinuric Kidney Disease*. J Am Soc Nephrol, 2018. **29**(10): p. 2529-2545.
25. Ioannou, I., et al., *Signatures of Co-Deregulated Genes and Their Transcriptional Regulators in Kidney Cancers*. Int J Mol Sci, 2023. **24**(7).
26. *The Kidney Precision Medicine Project (KPMP) Tissue Atlas*. Available from: <https://atlas.kpmp.org/>.
27. Lake, B.B., et al., *A single-nucleus RNA-sequencing pipeline to decipher the molecular anatomy and pathophysiology of human kidneys*. Nat Commun, 2019. **10**(1): p. 2832.
28. Lake, B.B., et al., *An atlas of healthy and injured cell states and niches in the human kidney*. Nature, 2023. **619**(7970): p. 585-594.
29. Zhang, R., et al., *Profiling Cell Heterogeneity and Fructose Transporter Expression in the Rat Nephron by Integrating Single-Cell and Microdissected Tubule Segment Transcriptomes*. Int J Mol Sci, 2024. **25**(5).
30. Anderson, M.J., *Permutational Multivariate Analysis of Variance (PERMANOVA)*, in *Wiley StatsRef: Statistics Reference Online*. 2017. p. 1-15.
31. McArdle, B.H. and M.J. Anderson, *Fitting Multivariate Models to Community Data: A Comment on Distance-Based Redundancy Analysis*. Ecology, 2001. **82**(1): p. 290-297.
32. Oksanen, J., et al., *vegan: Community Ecology Package*. R package version 2.5-7. 2020: CRAN.R-project.
33. Zapala, M.A. and N.J. Schork, *Multivariate regression analysis of distance matrices for testing associations between gene expression patterns and related variables*. Proc Natl Acad Sci U S A, 2006. **103**(51): p. 19430-5.
34. Andrikopoulos, P., et al., *Evidence of a causal and modifiable relationship between kidney function and circulating trimethylamine N-oxide*. Nat Commun, 2023. **14**(1): p. 5843.
35. Harzandi, A., et al., *Acute kidney injury leading to CKD is associated with a persistence of metabolic dysfunction and hypertriglyceridemia*. iScience, 2021. **24**(2): p. 102046.
36. Ma, X., et al., *Comparative Transcriptome Sequencing Analysis of Hirudo nipponia in Different Growth Periods*. Front Physiol, 2022. **13**: p. 873831.
37. Roesel, C.L., et al., *Transcriptomics reveals specific molecular mechanisms underlying transgenerational immunity in Manduca sexta*. Ecol Evol, 2020. **10**(20): p. 11251-11261.
